# The evolution of reduced facilitation in a four-species bacterial community

Philippe Piccardi<sup>1</sup>, Eric Ulrich<sup>1</sup>, Marc Garcia-Garcerà<sup>1,2</sup>, Rita Di Martino<sup>1,2</sup>, Samuele E.  
A. Testa<sup>1</sup>, and Sara Mitri<sup>1,2</sup>

<sup>1</sup>Department of Fundamental Microbiology, University of Lausanne

<sup>2</sup>Swiss Institute for Bioinformatics

## Abstract

Microbial evolution is typically studied in mono-cultures or in communities of competing species. But microbes do not always compete and how positive inter-species interactions drive evolution is less clear: Initially facilitative communities may either evolve increased mutualism, increased reliance on certain species according to the Black Queen Hypothesis (BQH), or weaker interactions and resource specialization. To distinguish between these outcomes, we evolved four species for 44 weeks either alone or together in a toxic pollutant. These species initially facilitated each other, promoting each other's survival and pollutant degradation. After evolution, two species (*Microbacterium liquefaciens* and *Ochrobactrum anthropi*) that initially relied fully on others to survive continued to do so, with no evidence for increased mutualism. Instead, *Agrobacterium tumefaciens* and *Comamonas testosteroni* (*Ct*) whose ancestors interacted positively, evolved in community to interact more neutrally and grew less well than when they had evolved alone, suggesting that the community limited their adaptation. We detected several gene loss events in *Ct* when evolving with others, but these events did not increase its reliance on other species, contrary to expectations under the BQH. We hypothesize instead that these gene loss events are a consequence of resource specialization. Finally, co-evolved communities degraded the pollutant worse than their ancestors. Together, our results support the evolution of weakened interactions and resource specialization, similar to what has been observed in competitive communities.

**Keywords:** evolution, bacterial community, facilitation, Black Queen Hypothesis, specialization, community function

## 28 Introduction

29 How natural and engineered microbial communities function depends on ecological interac-  
30 tions between their member species. As species adapt to one another and to their environ-  
31 ment, these interactions may change, and as a consequence, the overall functioning of the  
32 community.<sup>1</sup> Being able to predict these evolutionary changes may help to intervene and drive  
33 a community towards a desirable function. One could imagine, for example, predicting how the  
34 gut microbiome would respond to an intervention against inflammatory bowel disease, or how  
35 a community in a microbial bioremediation system could be controlled to evolve toward a more  
36 stable, efficient state<sup>2-5</sup>.

37 Evolutionary prediction and control relies on understanding how selection acts on interactions  
38 between species. One way to study how these inter-species interactions evolve is to perform  
39 experimental evolution by passaging multi-species communities over sequential batch cultures  
40 or in chemostats over long time-periods, and following ecological changes in the relative abun-  
41 dances of different species as well as phenotypic and genotypic changes in each community  
42 member. Prior studies using this approach have found that microbes can rapidly adapt to both  
43 biotic and abiotic factors<sup>6-10</sup>, but being embedded within a community can limit adaption to  
44 abiotic factors<sup>8,11-15</sup>. In terms of inter-species interactions, bacterial communities that initially  
45 displayed negative interactions evolved towards neutral<sup>9,16</sup> or positive interactions<sup>8</sup>. This evo-  
46 lutionary response is intuitive, as species can be expected to reduce resource competition and  
47 niche overlap<sup>12,17,18</sup> and may adapt to use resources generated by other species<sup>8,12,16,19</sup>. Ac-  
48 cordingly, species evolving in isolation tend to extend their niches in absence of competition  
49 and compete when reintroduced into the community context<sup>8,13</sup>.

50 In contrast, studies that have experimentally evolved communities beginning with positive or  
51 facilitative interactions mostly contain only two species or two strains of the same species, often  
52 with strong dependencies on one another<sup>10,20-26</sup>. This may be because microbial isolates tend  
53 to compete with one another when co-cultured in the lab<sup>27</sup>, meaning that a synthetic community  
54 assembled in the lab is unlikely to spontaneously display several positive inter-species interac-  
55 tions. We expect three different outcomes compared to initially competitive communities (Fig.  
56 1): First, if positive interactions are constant and bi-directional over many generations, this  
57 might select for each species to increase its positive effect on the other, resulting in mutual-  
58 ism<sup>28,29</sup>. Second, species evolving together might evolve to exploit resources that are provided

59 by others, resulting in stable co-existence because the providing species itself depends on the  
60 resource. As proposed by the Black Queen Hypothesis<sup>30,31</sup>, a common consequence of the re-  
61 liance on public goods produced by others is that the receiving species are selected to lose  
62 genes for costly product pathways<sup>21,32</sup>. Third, positive interactions can weaken, particularly if  
63 the cooperative traits are costly, resulting in reduced reliance of species on one another<sup>33</sup>. If  
64 each species grows independently, one might expect species to evolve to each specialize on a  
65 different resource, thereby exploiting available niches more efficiently<sup>8</sup>.

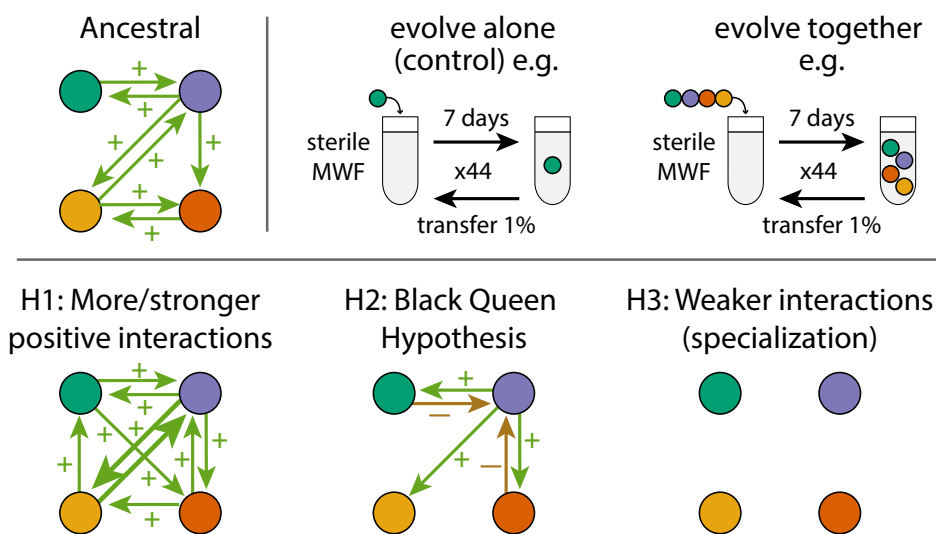

Figure 1: **Experiment and hypotheses.** Top: An ancestral community with facilitative interactions was evolved in MWF using serial transfers every 7 days for 44 weeks. Different species combinations were explored with species evolving either alone or in a community. Bottom: Hypotheses for how interactions in the community might evolve, assuming that they continue to coexist. H1: More/stronger positive or mutualistic (bi-directional positive) interactions. H2: According to the BQH, few species would provide the public goods for others that would lose the ability to produce them and possibly exploit the producing species. H3: Each species specializes on a different environmental niche, resulting in weaker inter-species interactions.

66 In our previous work<sup>34</sup>, we studied a community composed of four bacterial species (*Agrobac-*  
67 *terium tumefaciens* (*At*), *Comamonas testosteroni* (*Ct*), *Microbacterium liquefaciens* (*Ml*) and  
68 *Ochrobactrum anthropi* (*Oa*)) and showed that facilitation was more prevalent when the com-  
69 munity was grown in a toxic environment, in agreement with the Stress Gradient Hypothesis<sup>35</sup>.  
70 The toxic environment in question is an emulsion of machine oils used in the manufacturing  
71 industry called Metal Working Fluids (MWF), which the four species were capable of degrading  
72 when together. They are not known to have a common evolutionary history and were isolated  
73 from distinct MWF samples<sup>36,37</sup>. This community represents a tractable model system for ex-  
74 ploring how the abiotic and biotic environment shapes the evolution of positive inter-specific

75 interactions and how they relate to community function, in this case, MWF bioremediation.

76 In this study, the four bacterial species were grown in MWF and left to evolve either in isolation or  
77 together in communities (Fig. 1, top)<sup>8,13</sup>. We quantified bacterial growth and MWF degradation  
78 efficiency, and identified genomic changes. By the end of the experiment, positive interactions  
79 had declined between the two species evolving together that were able to grow on their own, but  
80 not for those that still relied on others to survive and grow. The species evolved in isolation were  
81 more productive than those evolved in community and tended to compete with one another  
82 when co-cultured. We found little evidence to support the Black Queen Hypothesis, as the  
83 species that experienced gene loss events did not increase their reliance on others to grow.  
84 Gene loss may instead be a signature of resource specialisation. These results suggest that  
85 evolving communities that begin with positive interspecies interactions can evolve similarly to  
86 those that begin with negative interactions. In our system, interactions weakened whenever  
87 dependencies disappeared, possibly due to niche partitioning, and the evolution of individual  
88 species was constrained by coexisting species.

## 89 **Results**

### 90 **Replicate microcosms for each species combination behaved similarly and con-** 91 **verged to even communities**

92 Our central question is how facilitative inter-species interactions drive evolution within a micro-  
93 bial community. We addressed this question using experimental evolution of four species either  
94 together in groups of 3 or 4 species, or alone as a control. The choice to include this particular  
95 3-species combination was based on preliminary data suggesting that *Oa* may affect commu-  
96 nity dynamics. While this intuition was confirmed, we do not compare the 3- and 4-species  
97 communities explicitly, but nevertheless include all combinations in our data set.

98 Over the first few weeks, population sizes experienced large fluctuations, which were less pro-  
99 nounced when species were evolving together. When evolving alone, *Ml* and *Oa* went extinct  
100 after the first transfer (data not shown), which was unsurprising as they do not grow alone in  
101 MWF unless the other species are present<sup>34</sup>. When evolving alone, *At* only persisted in 2 out of  
102 5 lines (henceforth CAt for “combination” *At*), while *Ct* survived in all 5 microcosms (henceforth  
103 CCt). The population sizes of both species dropped initially, but stabilized after about 6 and 11

104 transfers, respectively (Fig. 2B-C). When species were evolving together, population sizes sta-  
105 bilized after about 4 transfers in the 3-species community (CAAtCtMI, Fig. 2D) and 22 transfers  
106 in the 4-species community (CAAtCtMIOa, Fig. 2E), with the exception of *MI* that went extinct in  
107 2 out of 5 microcosms in the four-species community.

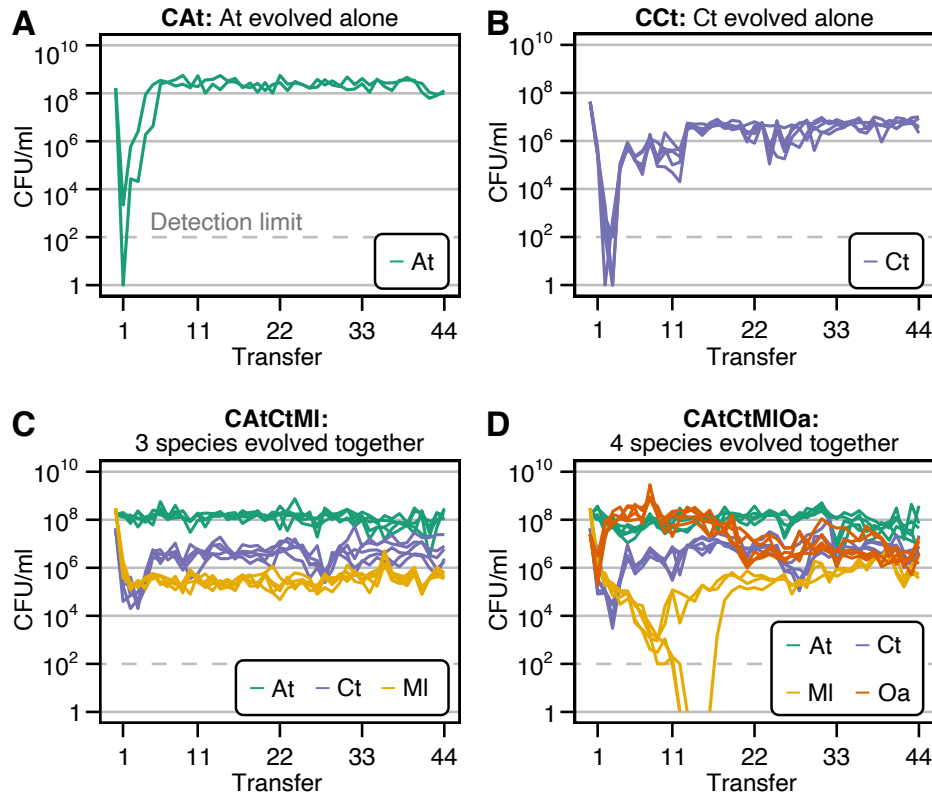

Figure 2: **Population sizes over time.** Experiments were started with each species in batch mono-culture or co-cultures of three and four species. Every week, we serially transferred cultures by diluting them 100-fold in fresh MWF for 44 weeks. Before each transfer, species abundances were quantified by selective plating. Each species combination (abbreviated as “C”) followed by the species combination inoculated at the start, e.g. **CAAtCtMI** initially consisted of 5 microcosm replicates (culture tubes). CFU/ml counts from selective plates are shown for all combinations: *At* evolved alone (green), where 3 microcosms dropped below the detection limit (at 10<sup>2</sup> CFU/ml and is indicated with a grey horizontal line) and were discontinued (A), *Ct* evolved alone (blue) (B), *At*, *Ct* and *MI* evolved together (C) and *At*, *Ct*, *MI* and *Oa* evolved together (D). In this species combination, *MI* dropped below the detection limit in three microcosms, but recovered in one.

108 In all microcosms where species did not go extinct, the population dynamics in replicate mi-  
109 crocosms of the same species combination were similar. By transfer 44, communities were  
110 quite even, with relatively small differences in population sizes between species that evolved  
111 together (Fig. 2D, E), as expected based on similar studies<sup>16</sup>. The total population sizes in  
112 the two co-evolving communities did not increase over time (as observed in<sup>21,38</sup>, e.g.), suggest-  
113 ing that species did not evolve to increase their own or other species’ yield<sup>16</sup>. In fact, fitting

114 a linear model to the total population size in evolving communities (CAAtCtMI and CAAtCtMIOa)  
115 showed a small yet significant decrease over transfers (slope= $-4.2 \times 10^6$ ,  $P < 10^{-9}$ ). Species  
116 that evolved alone instead showed no significant change (CAAt:  $P=0.21$ ) or increased over time  
117 (CCt: slope= $1.4 \times 10^5$ ,  $P < 10^{-15}$ ). Species that survived until the end of the experiment went  
118 through approximately 300 generations (Table S1).

### 119 **Positive species interactions weakened when evolving together**

120 We first explored whether interactions between the evolved species differed from the ancestral  
121 ones. We focused on the four species that evolved together (CAAtCtMIOa), and to represent the  
122 most abundant, genotypically-distinct sub-populations of each evolved bacteria, mixed equal  
123 proportions of ten isolates of each species coming from transfer 44 of the same replicate mi-  
124 crocosms (Fig. 3A (ii)). We used these mixes, as we detected some within-species phenotypic  
125 diversity in growth and degradation (Fig. S1, Fig. S2), but obtained similar results using only  
126 one isolate per species, suggesting that growth patterns are consistent across approaches (Fig.  
127 S3, Fig. S5). From now on, when referring to *species* in these evolved cultures, we mean these  
128 isolate mixes.

129 Using these isolate mixes, we measured the inter-species interactions in one microcosm where  
130 four species evolved together (CAAtCtMIOa, replicate microcosm 3, arbitrarily selected among  
131 microcosms where all four species were present at transfer 44). We incubated each species in  
132 mono-culture or in pairwise co-cultures with each of the other species from the same microcosm  
133 over 12 days (Fig. 3B). In mono-culture, contrary to its ancestor (Fig. S4), *At* was able to survive  
134 and grow in MWF alone. Both ancestral and evolved *Ct* were able to survive and grow in MWF  
135 (Fig. S3C), but the area under the growth curve (AUC) of evolved *Ct* was significantly lower  
136 across different assays (Fig. S5, Fig. S6B). Finally, *MI* and *Oa* from all microcosms were still  
137 unable to grow alone (Fig. S8).

138 By comparing the AUCs of mono-cultures with pair-wise co-cultures, we were able to reconstruct  
139 an interaction network (Fig. 3B), as previously done for the ancestral network in Piccardi et al. <sup>34</sup>.  
140 *MI* and *Oa* continued to rely on *Ct* for survival, but we found no evidence for increased mutualism  
141 between *MI* and *Ct* (Fig. S9). Unlike the ancestral community, evolved *At* promoted the survival  
142 and growth of *MI* and *Oa*, while it no longer benefited from evolved *Ct*. The appearance of  
143 positive interactions towards the two species that could not grow alone was expected because *At*

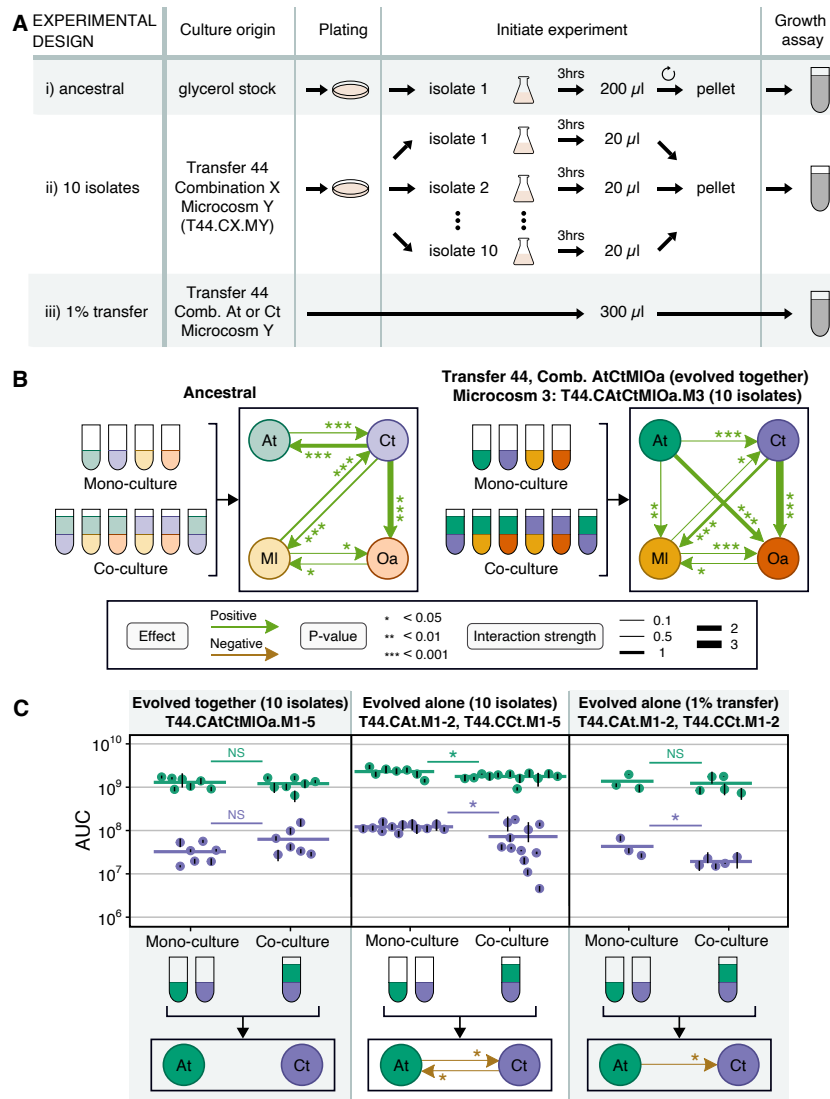

**Figure 3: Inter-species interactions.** (A) Growth assay experimental design. (i) Glycerol stock of ancestral isolate was grown alone for 3 hours to exponential phase, then washed and resuspended in MWF. (ii) Ten isolates of the same species from transfer 44 of a given species combination and microcosm replicate were randomly picked and grown alone 3 hours to exponential phase, then washed, resuspended and mixed in equal proportions in MWF. (iii) Microcosms from transfer 44 were diluted 100-fold in fresh MWF. We only did this for CAT and CCT (evolved alone), as we couldn't separate species from one another in CATctMI and CATctMIOa. (B) Inter-species interaction network in ancestral species (adapted from <sup>34</sup>) versus species evolved together in a community of four for 44 transfers (CATctMIOa, microcosm 3) during 12-day growth assays. (C) Interactions based on AUC between *At* and *Ct* evolved together (first column, CATctMIOa) or evolved alone (2nd and 3rd column, CAT and CCT, protocols ii and iii from panel A) during 8-day growth assays. For growth assays for CATctMIOa (first column) we only co-cultured isolates that had evolved together in the same microcosm, and analyzed all microcosms, with microcosm 3 carried out 3 times ( $n=7$ ). Matching mono-cultures were done in parallel. For the 2nd column, we mono-cultured CAT.M1  $\times 3$ , CAT.M2  $\times 4$  ( $n=7$ ), CCT.M1-2  $\times 3$  each and CCT.M3-5  $\times 2$  each ( $n=12$ ). We co-cultured all possible combinations of microcosms that had evolved alone (CAT.M1 + CCT.M1, CAT.M1 + CCT.M2, etc.) with CAT.M2 + CCT.M1 and CAT.M2 + CCT.M2 carried out twice ( $n=12$ ). For the 3rd column, we only tested four combinations: CAT.M1 + CCT.M1 (twice), CAT.M1 + CCT.M2, CAT.M2 + CCT.M1 and CAT.M2 + CCT.M2 ( $n=5$ ). Dots show means and black bars standard deviations of the AUCs, thick horizontal lines show the means of the dots. Significance was calculated using a generalized linear model taking into account microcosm and biological replicate.



144 could now grow independently<sup>34</sup>. The lack of competition between the two independent species  
145 (*At* and *Ct*) was however unexpected, as our intuition from previous work was that autonomous  
146 species should compete<sup>34</sup>. This motivated us to explore this relationship further.

147 To understand whether the weakened interaction between *At* and *Ct* was consistent across all  
148 five microcosms where the species had evolved together (CA*t*C*t*MIOa), we compared the growth  
149 of evolved *At* and *Ct* isolates from the same microcosms in mono- and pair-wise co-cultures.  
150 We found that the AUC, the maximal CFU/mL difference between two consecutive days of each  
151 species (a proxy for growth rate), and the maximum population size of *At*, did not differ signifi-  
152 cantly when co-cultured with *Ct* from the same evolved microcosm (linear model with biological  
153 replicate as a random effect; AUC:  $P = 0.65$ , Fig. 3C, left column; maximal CFU/mL differ-  
154 ence between two consecutive days:  $P = 0.37$ , Fig. S7B, left column; maximum population  
155 size:  $P = 0.56$ , Fig. S7C, left column). Instead, *Ct* had a significantly greater maximal growth  
156 rate when co-cultured with *At* from the same evolved microcosm, but its AUC and its maximum  
157 population size did not differ significantly (linear model with biological replicate as a random  
158 effect; AUC:  $P = 0.1275$ , Fig. 3C, left column; maximal CFU/mL difference between two consec-  
159 utive days:  $P = 0.0265$ , Fig. S7B, left column; maximum population size:  $P = 0.123$ , Fig. S7C,  
160 left column). In other words, taking into account all microcosms and several ways to measure  
161 interactions, *At* and *Ct* no longer interacted significantly.

## 162 **Species that evolved alone tended to interact negatively**

163 We wondered whether the reduction in positive interactions between *At* and *Ct* when evolved  
164 together was simply the result of adaptation to the harsh MWF conditions. We compared the  
165 growth of *At* and *Ct* that had evolved alone when grown in mono- and pair-wise co-cultures  
166 (Fig. 3C, middle column). Both species inhibited each other's growth, where the AUC (linear  
167 model with biological replicate as a random effect,  $Ct \rightarrow At$   $P = 0.015$ ,  $At \rightarrow Ct$   $P = 0.01$ )  
168 and maximal population size ( $Ct \rightarrow At$   $P = 0.004$ ,  $At \rightarrow Ct$   $P = 0.049$ ) (Fig. S7A, C) of the  
169 co-cultures were lower than the mono-cultures. Although the effect sizes do not appear large  
170 on the plot, they are non-negligible (e.g. AUCs of *At* and *Ct* were reduced by 22.8% and 40.5%  
171 on average, respectively). Overall, this suggests that the evolutionary response of *At* and *Ct* is  
172 different whether they evolve alone or in the community context.

173 One explanation for the competitive interactions may be that the isolates we used for these



174 assays had a particularly high fitness within their populations. To test whether our results were  
175 biased in this way, we transferred the entire populations of *At* and *Ct* from two microcosms  
176 each where they had evolved alone directly into mono- or co-culture assays (Fig. 3A (iii)). *At*  
177 still inhibited the growth of *Ct* (linear model with biological replicate as a random effect, *At*  
178  $\rightarrow$  *Ct*  $P = 0.045$ ) (Fig. 3C, right column), suggesting that there was likely nothing particular  
179 about the 10 isolates. In sum, the positive interactions between *At* and *Ct* in the ancestral  
180 strains switched toward more neutral interaction when evolving together, and competition when  
181 evolving alone.

## 182 **Species evolved alone were more productive than those evolved together**

183 A possible explanation for why species that evolved alone compete with one another in co-  
184 culture, is that evolving alone allows them to increase their niche coverage, resulting in com-  
185 petition with future invaders into its environment. If instead, a focal species is already sharing  
186 the environment with other species with which it does not compete, their presence may prevent  
187 the focal species from expanding its niche thereby limiting competitive interactions from aris-  
188 ing over evolutionary time-scales. While niche partitioning is difficult to quantify in a complex  
189 chemical environment like MWF, we predicted that if species that evolved alone cover more  
190 niche space, they should grow faster or to a larger population size compared to their counter-  
191 parts that evolved with others. Consistent with this prediction, the AUC of *At* and *Ct* that had  
192 evolved alone was significantly higher than their counterparts that had evolved in community  
193 (linear model with biological replicate as a random effect, *At*  $P = 0.001$ , *Ct*  $P < 0.001$ ), even  
194 when they were grown in co-culture (linear model with biological replicate as a random effect,  
195 *At*  $P < 0.001$ , *Ct*  $P < 0.0036$ , Fig. 3C, S1, S10). While these results do not prove that evolving  
196 alone led to greater niche expansion (they may simply have evolved higher yield), they match  
197 observations from previous studies<sup>8,9,12</sup> showing that adaptations to increase productivity are  
198 limited when species are evolving with others.

## 199 **Ecological context influences genomic changes.**

200 Given the differences between *Ct* and *At* that had evolved alone or together, we next wondered  
201 whether we could find corresponding genomic variations and determine when they emerged. To  
202 this end, we extracted and sequenced the DNA of all microcosm populations every 11 transfers  
203 and reconstructed their evolutionary trajectories (see Methods). Because we lack statistical

204 power for *At* (it only survived in 2 microcosms when evolving alone), we focused on *Ct*.

205 We observed distinct patterns for *Ct* evolved alone or together with other species (Fig. 4).

206 When evolved with other species (CA*t*C*t*MI and CA*t*C*t*MI<sub>Oa</sub>), *Ct* accumulated a higher number

207 of variants compared to when it was evolving alone (CC*t*, Kruskal-Wallis chi-squared = 6.818, P

208 = 0.009, Fig. 4B left), resulting in a higher total allele frequency (Fig. S13). But many variants

209 did not fix and remained at intermediate frequencies (Fig. 4A center and right). Instead, when

210 evolved alone, a significantly higher number and proportion of variants fixed (number: Kruskal-

211 Wallis chi-squared = 4.165, P = 0.041; proportion: Kruskal-Wallis chi-squared = 4.810, P = 0.028,

212 Fig. 4B center). This suggests suggests hard sweeps when evolving alone and soft sweeps when

213 evolving in community, which can be explained by the strong drop in population size early on

214 in the experiment when alone compared to in community (Fig. 2B versus C and D).

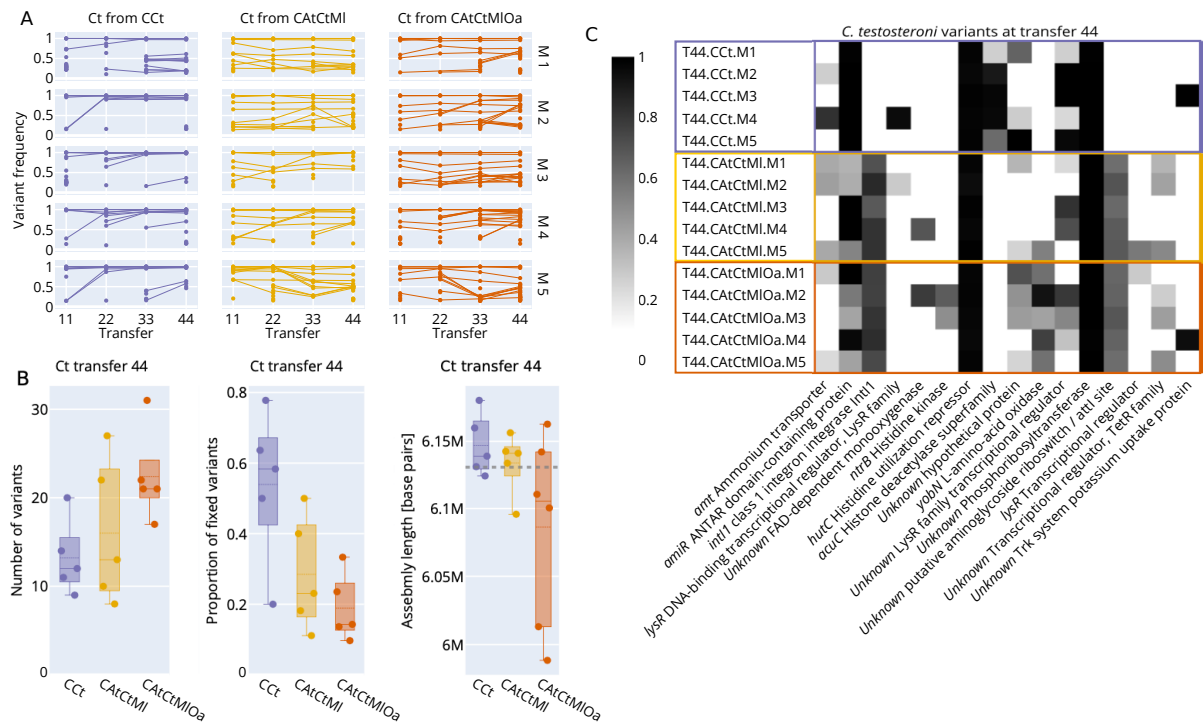

Figure 4: **Genomic changes.** (A) Variant frequency trajectories in all *Ct* populations. Each dot/line represents a different variant at a different location. (B) Number of variants found in each *Ct* population at transfer 44 (left, matches data in panel A), proportion of variants that reached fixation (center, matches data in panel A), and de-novo long-read assembly lengths based on PacBio sequencing of selected isolates from transfer 44 (right). The dashed line represents the assembly length of the ancestor. (C) Mutated genes with protein annotation that were found in at least two *Ct* populations. The grey shade indicates the frequency of the mutated allele.

215 Given that ecological context affected allele frequencies and fixation rates, we expected variant

216 targets to also depend on the presence or absence of other community members. We annotated  
217 the variants and filtered for genes that were mutated in at least 2 microcosms (Fig. 4C). One  
218 gene (*acuC*), which codes for a histone deacetylase, was mutated exclusively in CCt (in all 5 mi-  
219 crocosms). Mutations to seven genes were exclusive to combinations CAAtCtMI and CAAtCtMIOa  
220 (2 genes were affected in all 10 microcosms), and two genes were mutated and almost com-  
221 pletely fixed in all microcosms across all species combinations, likely related to adaptation to  
222 MWF.

223 In *Ct* coming from one particular microcosm (T44.CAAtCtMIOa,M2), we observed that 3 out of 10  
224 isolates were able to grow alone at two-fold higher MWF concentrations and had no measurable  
225 lag time, while the remaining 7 grew more characteristically for this species (Fig. S1, S2). We  
226 whole-genome sequenced one isolate from each subpopulation and identified a mutation in  
227 *ntrB* (coding for a Histidine kinase) in the more resistant strain. We confirmed that this variant  
228 was present but not fixed in the metagenomic sequencing data of that population. The resistant  
229 isolate also had a large deletion (Fig. S15C), which we discuss below. Why this more resistant  
230 variant did not fix, and whether the wildtype-like variant is acting as a cheater is unclear.

### 231 **No evidence for Black Queen dynamics in our system**

232 The Black Queen Hypothesis<sup>30,31</sup> (BQH) predicts that if several species in a community are  
233 contributing to a public good, all but one species should lose this trait, leading to gene loss in  
234 evolving communities. In our system, environmental detoxification can act as a public good.  
235 Although we do not know which genes are involved, we explored whether gene loss occurred  
236 preferentially for species evolved together compared to alone by long-read sequencing whole  
237 genomes of isolates from all microcosms at transfer 44 (see Methods). After assembling full  
238 *Ct* and *At* genomes, we found that two *Ct* isolates from CAAtCtMIOa were over a 100k base-  
239 pairs shorter than the reference genome. We mapped these to the reference strain and found  
240 an identical deletion of 145k base pairs including 31 genes (see Fig. S15). We doubt that  
241 these deletions are due to increased dependence on other species in the community, as the  
242 BQH would predict, as these two isolates grew similarly in isolation to the ones without the  
243 deletion (Fig. S1). Indeed, one of these isolates was the strain that was resistant to higher MWF  
244 concentrations described above and grew better than the other isolates (Fig. S1, S2). For *At* we  
245 observed a large deletion in one isolate from CAAtCtMI, but nothing striking for *MI* and *Oa* (Fig.

246 **S13B**). Despite these observations, we lack statistical power to conclude anything general. We  
247 also used the assemblies to check if any sequences from other species were integrated in the  
248 genomes, however, no transfer events were detected.

249 As it seemed plausible that 44 weeks were too short for structural changes to occur systemat-  
250 ically, we next explored whether point mutations in regulatory regions might have instead led  
251 to down-regulation in gene expression in evolved communities. We extracted and sequenced  
252 RNA from isolates of all microcosms of *Ct* and *At* at transfer 44 as well as their ancestors. As  
253 the quality of RNA from *At* samples was low, we focused on *Ct*. Contrary to the prediction of the  
254 BQH, we found no significant difference in the normalized expression levels from the isolates  
255 of CA*tCt*MI and CA*tCt*MIOa that had evolved in community, while several genes in isolates that  
256 had evolved alone (C*Ct*) were significantly down-regulated when compared to the ancestor (Fig.  
257 **S13C-E**, Table **S2**). The only mutation present uniquely and repeatedly in C*Ct* was in the *acuC*  
258 gene, which is expected to affect gene expression.

### 259 ***At* degrades MWF better after evolving alone but not in community**

260 Next, we investigated whether the decline in positive inter-specific interactions over the 44  
261 transfers was associated with a shift in MWF degradation efficiency (as in Rivett et al. <sup>16</sup>). If,  
262 for example, co-evolved species have indeed reduced their niche overlap and diverged in their  
263 resource use, we might expect greater overall MWF degradation. On the other hand, *Ct* that  
264 evolved in the community grew slower than its ancestor, which may lead to worse degradation,  
265 as it is one of the main degraders in the community<sup>34</sup>.

266 Over the 44 transfers (Fig. **5A**), *Ct* and the two evolved communities reduced their degradation  
267 efficiency, such that at the end, they degraded less than their ancestral counterparts (%COD on  
268 day 7, isolates from transfer 1 vs. 44 in *Ct* evolved alone, CA*tCt*MI and CA*tCt*MIOa, respectively:  
269 paired t-tests,  $t = -5.7165$ ,  $P < 0.01$ ;  $t = -14.641$ ,  $P < 0.001$ ;  $t = -18.131$ ,  $P < 10^{-4}$ ). In  
270 contrast, the two microcosms in which *At* evolved alone degraded significantly better than their  
271 ancestral counterpart (%COD on day 7, isolates from transfer 1 vs. 44 in mono-evolved *At*: linear  
272 model,  $t = -20.91$ ,  $P < 10^{-5}$ , Fig. **5A**) and even compared to all other microcosms (%COD on  
273 transfer 44, day 7, comparing *At* with *Ct* and the 3- and 4-species communities, respectively:  
274 linear model,  $t = 10.85$ ,  $P < 0.001$ ; linear model,  $t = 10.35$ ,  $P < 0.001$ ; linear model,  $t = 8.274$ ,  
275  $P < 0.001$ , Fig. **5A**).

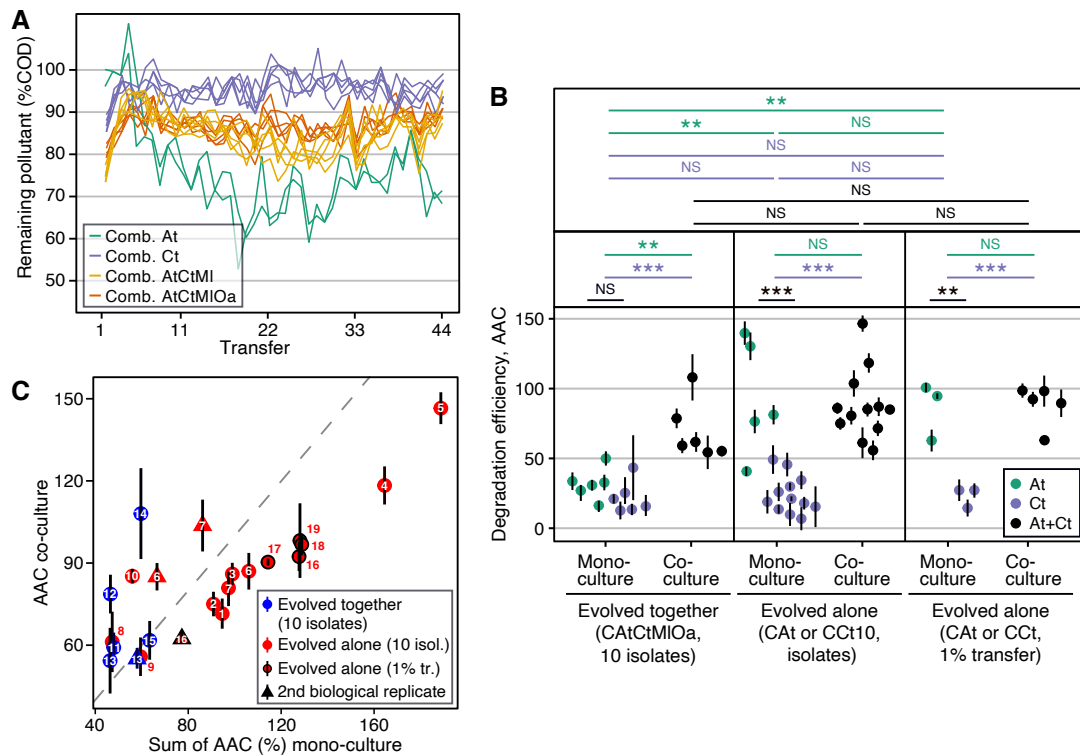

Figure 5: **Degradation efficiency.** (A) Remaining pollutant, measured as chemical oxygen demand (COD, g/L) as a percentage of the COD of an abiotic control for each microcosm before each transfer in all four species combinations (lower implies greater degradation). (B) Comparison of the degradation efficiency of *At* and *Ct* ancestral, evolved alone or together with others, where the Area Above the degradation Curve over 8 days is shown (higher AAC implies greater degradation, unit is sum of percentages). (C) Prediction of an additive model of the sum of degradation efficiencies of individual species is plotted against degradation efficiency of the co-cultures of mono- versus co-evolved species. Points lying above (or below) the dashed line degrade more (or less) efficiently than predicted by the additive model. Each small number associated with a datapoint indicates a given species combination (e.g. CA.t.M1 + CCT.M1). Certain numbers have both a circle and a triangle, which are biological replicates of the same species combination. A list of which number corresponds to which combination can be found in Dataset 1.

276 Knowing that *At* was a member of the two evolved communities, we wondered why the degrada-  
 277 tion efficiency of the communities was worse than *At* evolved alone. Did the community mem-  
 278 bers inhibit the degradation efficiency of *At* or did it not evolve improved degradation? We find  
 279 evidence to support the latter: when grown alone, *At* from the evolved community degraded  
 280 less efficiently than when it had evolved alone (%AAC, assays with 10 isolates and 1% trans-  
 281 fer, respectively: linear model with biological replicate as random factor,  $t = 3.590$ ,  $P < 0.01$ ;  
 282  $t = 5.373$ ,  $P < 0.01$ , Fig. 5B). This mirrors our earlier observation that *At* that had evolved alone  
 283 grew to greater population sizes than when evolved in community (Fig. 3C, S1, S10, compare  
 284 *At* mono-cultures). These data suggest that other species may have constrained the evolution

285 of *At*, preventing it from evolving greater degradation efficiency by occupying some niches that  
286 it could instead fill when evolving alone. If the species that evolved together with *At* are filling  
287 the available niches, might they complement *At*'s ability to degrade MWF?

## 288 **Species evolved together degrade MWF synergistically**

289 Following our observation that *At* evolved in community does not degrade as much as when  
290 it evolved alone, we wondered whether the species evolving together with *At* – notably *Ct* –  
291 could improve its degradation efficiency. By applying an additive null model to degradation ef-  
292 ficiency, we compared the combined degradation of the two mono-cultures of these two species  
293 to degradation in their corresponding co-cultures<sup>9,16,34,39</sup> (Fig. 5C). Although there were some  
294 differences between experimental repeats with different sub-samples of the evolved popula-  
295 tions, overall, we found that *At* and *Ct* that had evolved in the same microcosms had small  
296 positive effects on each other's degradation efficiency (statistical analysis in Fig. S11). For the  
297 species that had evolved alone, depending on which isolates we used for the assays, we found  
298 that in some cases the two species significantly reduced each other's degradation efficiency  
299 (Fig. S11). Together, this supports the hypothesis that co-evolving species do not overlap much  
300 in their niches and can therefore synergistically degrade MWF. Instead, *Ct* that had evolved  
301 alone seems to interfere with the degradation ability of *At* that had evolved alone, which sug-  
302 gests that the potential of *At* to expand its niches and increase its own degradation efficiency  
303 may have been limited when it evolved in the community context.

## 304 **Discussion**

305 Our main goal was to establish how interactions within a facilitative community might change  
306 as species evolved together. Would interactions become more mutualistic, would one species  
307 become parasitized by the others to produce all the public goods (as per the BQH) or would  
308 they evolve to specialize or even compete (Fig. 1)? Similar experiments with initially competi-  
309 tive communities found that interactions weaken as their members co-evolve to specialize on  
310 different resources<sup>6,8,9,13,16,40</sup>. In our 44-week long evolution experiment, species that relied  
311 heavily on others to survive in MWF continued to do so, but with no evidence of strengthened  
312 mutualism. Instead, one species *At*, that evolved to grow independently in MWF weakened its  
313 positive interaction with the other independent species, *Ct*. When we evolved each of those two

314 species alone, they competed when put back together.

315 Our interpretation of this outcome – while well aware that alternative explanations exist – is that  
316 in the community, *At* and *Ct* experienced weak selection to expand into occupied niches and  
317 compete with other residents, driving them to specialize on more available resources (H3 in  
318 Fig. 1), analogous to character displacement in Darwin’s finches<sup>41-43</sup>. Instead, when evolving  
319 alone, they may have become generalists by expanding into available niches because no other  
320 species were occupying them<sup>12</sup>. The presence of other species may then have constrained the  
321 evolutionary potential of *At* and *Ct* (similar to results reported by Hall et al.<sup>12</sup>). Evidence for this  
322 is that after evolving alone, isolates of these two species grew significantly better than those  
323 that had evolved in community. Indeed, *At* evolving alone was the only condition where degrada-  
324 tion improved over the course of the experiment and largely surpassed the degradation ability  
325 of the community, even though the community includes *At*. In follow-up experiments reported  
326 elsewhere we also found that new, non-resident species were more likely to invade the ances-  
327 tral compared to the evolved community<sup>44</sup>, suggesting that the community members evolved  
328 to cover the available niche space. An alternative initial hypothesis was that positive interac-  
329 tions might increase, leading to the evolution of mutualism (H1 in Fig. 1) because mutants that  
330 overproduce public goods should be favored as they promote the growth of species that “help”  
331 them<sup>28,29</sup>. This outcome can result in increased community productivity<sup>22,45</sup>, increased aggre-  
332 gation between cooperating strains<sup>20,23,25</sup> and/or loss of independent growth<sup>21</sup>. By comparing  
333 the ancestral and evolved interaction networks (Fig. 3), the bi-directional interactions between  
334 *Ct* and *Ml* were a candidate for this. However, we found no significant increase in the strength  
335 of their positive interactions, at least in this one microcosm (Fig. S9). Second, the number of  
336 positive interactions may increase if species generate new niches, which others can evolve to  
337 occupy<sup>8,24,46</sup>. While it may appear that there are more positive interactions in the evolved com-  
338 munity (Fig. 3), the positive effects of *At* on *Ml* and *Oa* were already observed in the ancestors  
339 growing under conditions where *At* survives<sup>34</sup>, and are not newly evolved traits. In addition, if  
340 stronger positive interactions had evolved, we would expect overall community productivity to  
341 go up because resource use becomes more efficient<sup>8,38</sup>. While we do find some synergy in  
342 MWF degradation, the co-evolved co-cultures still degrade less than *At* evolved alone, and total  
343 population sizes even decreased over the evolutionary experiment.

344 The other question was whether we would find support for the Black Queen Hypothesis<sup>30</sup> (H2 in



345 Fig. 1): if several species in the ancestral community provide a “service”, others should evolve  
346 to lose it, manifesting itself in gene loss for species evolving together<sup>30,47</sup>. What constitutes  
347 a “service” in our context is not clear mechanistically, but *At* and *Ct* do facilitate the other two  
348 species by detoxifying the environment<sup>34</sup>. If they were initially achieving this in overlapping  
349 ways, the two species might evolve to specialize on degrading different toxins. This would  
350 predict greater gene loss or reduced gene expression in the species evolved together compared  
351 to those evolved alone, and greater reliance on one another for survival. We found little evidence  
352 in support of this prediction: two *Ct* isolates that had evolved in community experienced large  
353 deletions, but these isolates grew similarly alone to others without the deletion, and at least one  
354 of them was even more resistant to MWF compared to a strain that had evolved alone.

355 These findings made us realize that the evolution of resource specialization within a community  
356 predicts similar patterns of gene loss to the BQH, as the ability to use certain resources that  
357 are already taken up by others becomes superfluous (Fig. S16). Given that our data generally  
358 support niche specialization rather than increased reliance on other species (at least for the two  
359 species we focused on), the deletions we see may be more in line with specialization rather than  
360 the BQH, but additional work would be needed to test this idea. In other words, we suggest that  
361 the BQH and specialization are two similar processes that we expect to drive genomic changes  
362 when species evolve in community. By itself then, gene loss alone should not be taken as  
363 evidence supporting the BQH.

364 Why the bacteria evolved to degrade less in all conditions except for *At* evolving alone, is an  
365 important open question when optimizing microbial community function. One possibility is  
366 that in the communities and when *Ct* was alone, selection favored the emergence of cheaters  
367 that grew faster but contributed less to MWF degradation, which may have increased the death  
368 rate, explaining the lack of increase in total population size<sup>48,49</sup>. Alternatively, cells might have  
369 evolved to resist the toxins without secreting toxin-degrading enzymes, for example by thicken-  
370 ing the cell wall or using efflux pumps<sup>50-52</sup>. This would make resistance into a “private good”  
371 and reduce MWF degradation. Third, the community constrained the evolution of *At*, explain-  
372 ing why its degradation did not improve when evolving in the community. Regardless of the  
373 mechanism, our results suggest that the problem of loss of community function needs to be  
374 addressed in future studies. Otherwise, single species like *At* might be better suited compared  
375 to communities, at least for this particular function of MWF degradation.

376 A final interesting question in community evolution concerns predictability: Do parallel micro-  
377 cosms evolving under the same condition resemble one another? Previous evolutionary experi-  
378 ments using communities found bimodal or trimodal outcomes in final relative abundances<sup>53,54</sup>.  
379 We observed striking parallel ecological dynamics between microcosms, whereby relative abun-  
380 dances converged by week 44, despite the occasional extinction of *Ml*. *Oa* appeared to play  
381 a destabilizing role, as population sizes of all species fluctuated more strongly in CAtCtMlOa  
382 compared to CAtCtMl before converging (Fig. 2C, D). As in other such experiments<sup>10,20,26</sup>, we  
383 also observed some parallelism in genomic evolution, where several mutations and deletions  
384 occurred in parallel lines of the same experimental condition, at least in *Ct*. While it is tempting  
385 to speculate on the effects these mutations might have, we prefer to leave mechanistic analyses  
386 to future work where we would build the appropriate mutants.

387 One of the weaknesses of our system is that chemical analysis is challenging, meaning that we  
388 lack a mechanistic understanding of pollutant degradation or the interactions between species.  
389 We are therefore blind to how resources are being partitioned, what lies behind the positive in-  
390 teractions, the consequences of genomic changes, or why degradation efficiency dropped over  
391 time in evolving communities. Another difficulty was our inability to generalize, as the commu-  
392 nity only includes four species, and each followed a different evolutionary trajectory. Running  
393 similar experiments using communities with more species in a simpler chemical environment  
394 could help to test our hypotheses further.

395 Our experiments present a case study of how four species can evolve in a toxic environment,  
396 showing that for species pairs whose dependencies were facultative, interactions weakened  
397 over time. Positively interacting species are therefore not necessarily expected to evolve to-  
398 wards mutualism<sup>29</sup>, and can instead evolve similarly to competitive communities. From an  
399 applied perspective, community function dropped over time as the species evolved, suggesting  
400 that to maintain function, new strategies are needed. Finally, parallels can be drawn to evolu-  
401 tion in other toxic environments, such as those containing antibiotics, a phenomenon that has  
402 classically been studied in single species in isolation<sup>55</sup>. Being able to predict and control the  
403 evolution of microbial communities would be impactful in many such contexts.

## 404 **Methods and Materials**

### 405 **Bacterial species and culture conditions**

406 The ancestral species used in this study were *Agrobacterium tumefaciens* str. MWF001, *Comamonas testosteroni* str. MWF001, *Microbacterium liquefaciens* str. MWF001, and *Ochrobactrum anthropi* str. MWF001. More details on these strains can be found in Piccardi et al.<sup>34</sup> and their genome sequences on NCBI (Accession: PRJNA991498). Note that *Microbacterium liquefaciens* was previously referred to as *Microbacterium saperdae* but a more recent classification has led us to refer to it differently.

412 All experiments were performed in 30ml batch cultures in glass tubes containing 0.5% (v/v) Castrol Hysol™ XF MWF (acquired in 2016) diluted in water with added salts and metal traces (see Piccardi et al.<sup>34</sup> for detailed recipe). Cultures were incubated at 28°C, shaken at 200 rpm.

### 416 **Evolution experiment**

417 All the experiments (initially 6 treatments: 4 mono-cultures, 1 3-species co-culture, 1 4-species co-culture) were conducted simultaneously in 5 microcosm replicates to give 30 experimental cultures in addition to 3 sterile controls (Fig. 6).

| Combination                                      | Color code and full species names                                                                                                                                                | Number of microcosms |             |
|--------------------------------------------------|----------------------------------------------------------------------------------------------------------------------------------------------------------------------------------|----------------------|-------------|
|                                                  |                                                                                                                                                                                  | Transfer 0           | Transfer 44 |
| CA <sub>t</sub>                                  |  <i>A. tumefaciens</i>                                                                        | 5                    | 2           |
| CC <sub>t</sub>                                  |  <i>C. testosteroni</i>                                                                       | 5                    | 5           |
| CA <sub>t</sub> CC <sub>t</sub> MI               |  <i>A. tumefaciens</i> + <i>C. testosteroni</i> + <i>M. liquefaciens</i>                      | 5                    | 5           |
| CA <sub>t</sub> CC <sub>t</sub> MIO <sub>a</sub> |  <i>A. tumefaciens</i> + <i>C. testosteroni</i> + <i>M. liquefaciens</i> + <i>O. anthropi</i> | 5                    | 5           |
| CMI                                              |  <i>M. liquefaciens</i>                                                                       | 5                    | 0           |
| CO <sub>a</sub>                                  |  <i>O. anthropi</i>                                                                           | 5                    | 0           |

Figure 6: **Evolved species combinations.**

420 All tubes were incubated at 28°C, shaken at 200 rpm for a total of 7 days. Each week for a total of 44 weeks, 29.7 mL of fresh MWF medium was prepared and 300 μL of the week-old culture transferred into it. Before each transfer, population sizes (CFU/mL) were quantified using serial dilution and selective plating and CODs (pollution load) were quantified using Macherey Nagel

424 15 g/L COD tube tests (see Piccardi et al.<sup>34</sup> for detailed recipe). A sterile tube containing MWF  
425 but no bacteria was always used as a control for the COD measurement. Every week, 1mL of  
426 the bacterial cultures was harvested for each treatment, spun down at 10,000 rcf for 5 minutes,  
427 resuspended in glycerol 25% (diluted in PBS) and stocked at -80°C for future analyses (e.g. DNA  
428 extraction). All 5 replicate populations of *M. liquifaciens*, *O. anthropi* and 3 replicate populations  
429 of *A. tumefaciens* in mono-culture went extinct, and these microcosms were discarded after 10  
430 weeks.

431 At the end of the experiments (after transfer 44), we collected 10 individual isolates of each  
432 species from each population for further analysis by plating populations on selective media  
433 and randomly picking 10 colonies. These colonies were then grown overnight in TSB at 28°C,  
434 shaken at 200 rpm, spun down at 10,000 rcf for 5 minutes, resuspended in glycerol 25% (diluted  
435 in PBS) and stocked at -80°C.

## 436 **Bioinformatic analysis**

437 **Ancestral lineage sequencing and annotation.** DNA coming from each ancestral species  
438 was sequenced using a combination of Illumina (MiSeq) and PacBio (RSII). PacBio raw data  
439 for each genome sequencing was assembled using canu v. 2.2<sup>56</sup> and polished with racon v.  
440 1.5.0.<sup>57</sup> The assembly was further corrected using the Illumina data with polypolish v. 0.5.0.<sup>58</sup>  
441 The assemblies were then annotated using bakta v. 1.2.4.<sup>59</sup>

442 **DNA extraction and sequencing.** To extract DNA from the frozen populations for Illumina  
443 sequencing, we defrosted the populations from the T-1 transfer (e.g. to sequence transfer 22,  
444 we defrosted transfer 21), washed and resuspended the cells in 1ml of PBS and inoculated 300  
445  $\mu$ L into 29.7 mL of fresh MWF medium. After 1 week, we collected 15mL of each sample, split into  
446 1.5mL Eppendorf tubes and spun down at 10'000rpm for 10 minutes. The bi-phasic supernatant  
447 was carefully discarded. Pellets coming from the same sample were resuspended in PBS and  
448 pooled together into one single 1.5mL Eppendorf tube. Cells were precipitated and resuspended  
449 in PBS twice, to remove any remaining MWF. A negative control was included in the process  
450 and followed the same procedure as the samples. To extract DNA from isolates for PacBio  
451 sequencing, we grew the previously frozen isolates overnight in TSB at 28°C, shaken at 200  
452 rpm, and spun them down at 10,000 rcf for 5 minutes.

453 The resulting pelleted cells were incubated in 150  $\mu$ L of lysozyme solution for 30 minutes at

454 37°C. After this incubation period, 5  $\mu$ l of RNase solution (5mg/ml) was added. The RNase  
455 treatment was performed for 30 more minutes at the same temperature. The lysozyme action  
456 creates pores in the cell wall of the cells, allowing the RNase to degrade any possible remaining  
457 RNA in the sample. After this second incubation period, 600 $\mu$ l of lysis buffer was added to the  
458 sample. The lysis buffer solution contains 9.34mL of TE buffer (PH 8), 600 $\mu$ l of SDS 10%, 60 $\mu$ l  
459 of Proteinase K and 2 $\mu$ l of  $\beta$ -mercaptoethanol. Cell lysis was performed for 1 hour at 56°C. Once  
460 the cell suspension became transparent, 700 $\mu$ l ( 1v/v) of Phenol-Chlorophorm-Isoamylalcohol  
461 (PCI, 25:24:1) was added to the tube. Samples were mixed by inversion for 1 minute and left  
462 to rest on ice to allow phase separation. After the phases were clearly visible, the sample was  
463 centrifuged at 13'000 rpm for 15 minutes at 4°C. The resulting clear supernatant was transferred  
464 to a new tube ( 600 $\mu$ l of volume). PCI cleaning was performed one more time to purify the DNA,  
465 resulting in around 500 $\mu$ l of clear liquid containing the suspended DNA. After the DNA cleaning,  
466 50 $\mu$ l of sodium acetate (5M) and 500 $\mu$ l of Isopropnol were added to the sample, allowing the  
467 DNA to precipitate. Insoluble DNA was incubated at -80°C for two hours and centrifuged down  
468 at 13'000 rpm for 15 minutes. The alcoholic supernatant was discarded. The precipitated DNA  
469 was washed with 1ml of ethanol 70% (v/v), re-centrifuged at 13'000 rpm for 15 more minutes,  
470 and the supernatant removed. The air dried pellet was then redissolved in 50 $\mu$ l nuclease-free  
471 water, and the concentration and purity were analyzed using Qubit and Nanodrop.

472 The obtained DNA was sequenced with using the Illumina platform with two different platforms  
473 at the Oxford genomics facilities: Samples from transfer 22 were sequenced using HiSeq4000.  
474 While transfers 11,33,44 were sequenced using NovaSeq. The reason behind the different plat-  
475 form usage was the discontinuation of the former at the selected facility. PacBio sequencing  
476 was performed on individual isolates of each species from transfer 44 (Table x) at the Lausanne  
477 Genomic Technologies Facility using a Sequel II system (SMRT cell 8M).

478 **RNA extraction and sequencing.** We grew the previously frozen isolates from transfer 44  
479 (see above) overnight in TSB, washed them in PBS and then inoculated 300  $\mu$ L into 29.7 mL  
480 of fresh MWF medium. After 7 days of growth, the cells were pelleted and the RNA extracted  
481 using the RNeasy PowerSoil Total RNA Kit. The extraction yielded a minimum of 30 ng/ $\mu$ l in 10  
482  $\mu$ l. The sequencing library was prepared including ribosomal RNA depletion using the Illumina  
483 ZeroPlus library perparation kit and sequenced on a NovaSeq 600 sequencer.

484 **Sequence data processing and analysis.** For each Illumina sequencing data-set, an initial

485 quality control was performed using FastQC, to evaluate the overall per-position quality, the k-  
486 mer enrichment (which could indicate adapter contamination), and the GC-content (which could  
487 indicate origin admixture).<sup>60</sup> Adapters and low quality sequences were removed using trimmo-  
488 matic v. 0.36, using the parameters PE, leading=3, trailing=3, slidingwindow=4:15, minlen=60.<sup>61</sup>  
489 The resulting cleaned reads were mapped against the ancestral genome references using min-  
490 imap2 v. 2.22.<sup>62</sup> For sequencing data derived from microcosms with multiple species, the reads  
491 were aligned against all merged ancestral reference genomes with no secondary mapping in  
492 order to avoid cross-mapping. The mapping was filtered to remove distant alignments and low  
493 quality alignments using samtools view with the parameters -f 3 and -q 60.<sup>63</sup> Based on the  
494 filtered alignment files, we identified variants with freebayes version 1.3.6 with the parameters  
495 -min-alternate-count 3 -min-alternate-fraction 0.05 -pooled-continuous -haplotype-length 0  
496 -standard-filters.<sup>64</sup> Variants outputted by freebayes were then filtered by a minimum popula-  
497 tion frequency of 10% and a minimum Phred quality of 20. A variant was considered fixed if it  
498 exceeded a frequency of 95%.

499 PacBio whole-genome sequencing data were assembled using canu version 2.2.<sup>56</sup> The resulting  
500 assemblies were polished with racon 1.5.0,<sup>57</sup> and annotated with bakta v. 1.2.4.<sup>59</sup> To investigate  
501 potential intra-species gene transfers, we split the assemblies into 150-mers and taxonomically  
502 classified the 150-mers using using krakken 2.1.2.<sup>57,65</sup> RNA sequencing data was analyzed using  
503 the RASflow workflow with default parameters wrapping hisat2 2.1.0 as an aligner, htseq-count  
504 0.11.2 for feature counting and edgeR 3.26.0 for differential expression analysis.<sup>66</sup> All scripts  
505 and data sets are or will be available at the following DOIs: 10.5281/zenodo.10694070 (data)  
506 and 10.5281/zenodo.10694150 (code).

## 507 **Acknowledgments**

508 We thank Julien Luneau, Afra Salazar, Oliver Meacock, Massimo Amicone and Margaret Vogel  
509 for useful and constructive feedback on the manuscript. We thank Christopher van der Gast and  
510 Ian Thompson for the 4 species used. We thank Sabrina Rivera for help with the experiments.  
511 PP and SM conceived the study, PP, SM and MGG designed the experiment, PP performed  
512 the evolution experiment and all follow-up experiments with the help of SEAT, MGG and PP  
513 extracted the DNA and sent it for sequencing, EU performed bioinformatic analysis after some  
514 initial analysis by MGG, RDM performed RNA extractions, PP, EU and SM wrote the paper. PP

515 and EU were funded by the University of Lausanne, MGG, RDM and SM were funded by European  
516 Research Council Starting Grant 715097, and SEAT and SM by the NCCR Microbiomes from the  
517 Swiss National Science Foundation.

## 518 References

- 519 [1] Segar, S. T.; Fayle, T. M.; Srivastava, D. S.; Lewinsohn, T. M.; Lewis, O. T.; Novotny, V.; Kitch-  
520 ing, R. L.; Maunsell, S. C. The Role of Evolution in Shaping Ecological Networks. 2020;  
521 <https://doi.org/10.1016/j.tree.2020.01.004>.
- 522 [2] Widder, S. et al. *The ISME Journal* **2016**, *10*, 2557–2568.
- 523 [3] De Roy, K.; Marzorati, M.; Van den Abbeele, P.; Van de Wiele, T.; Boon, N. *Environmental*  
524 *Microbiology* **2014**, *16*, 1472–1481.
- 525 [4] Gorter, F. A.; Manhart, M.; Ackermann, M. *Philosophical Transactions of the Royal Society*  
526 *B: Biological Sciences* **2020**, *375*, 20190256.
- 527 [5] Atashgahi, S.; Sánchez-Andrea, I.; Heipieper, H. J.; van der Meer, J. R.; Stams, A. J. M.;  
528 Smidt, H. *Science (New York, N.Y.)* **2018**, *360*, 743–746.
- 529 [6] Gravel, D.; Bell, T.; Barbera, C.; Bouvier, T.; Pommier, T.; Venail, P.; Mouquet, N. *Nature* **2011**,  
530 *469*, 89–92.
- 531 [7] Savolainen, O.; Lascoux, M.; Merilä, J. Ecological genomics of local adaptation. 2013; [www.](http://www.nature.com/reviews/genetics)  
532 [nature.com/reviews/genetics](http://www.nature.com/reviews/genetics).
- 533 [8] Lawrence, D.; Fiegna, F.; Behrends, V.; Bundy, J. G.; Phillimore, A. B.; Bell, T.; Barra-  
534 clough, T. G. *PLoS Biology* **2012**, *10*, e1001330.
- 535 [9] Fiegna, F.; Moreno-Letelier, A.; Bell, T.; Barraclough, T. G. *The ISME Journal* **2015**, *9*, 1235–  
536 1245.
- 537 [10] Henriksen, N. N. S. E.; Hansen, M. F.; Kiesevalter, H. T.; Russel, J.; Nesme, J.; Foster, K. R.;  
538 Svensson, B.; Øregaard, G.; Herschend, J.; Burmølle, M. *npj Biofilms and Microbiomes*  
539 **2022**, *8*, 59.
- 540 [11] Gómez, P.; Buckling, A. *Ecology Letters* **2013**, *16*, 650–655.



- 541 [12] Hall, J. P. J.; Harrison, E.; Brockhurst, M. A. *Evolution Letters* **2018**,
- 542 [13] Castledine, M.; Padfield, D.; Buckling, A. *Ecology Letters* **2020**, *23*, 1673–1681.
- 543 [14] Collins, S. *Proceedings of the Royal Society B: Biological Sciences* **2011**, *278*, 247–255.
- 544 [15] Runquist, R. D.; Gorton, A. J.; Yoder, J. B.; Deacon, N. J.; Grossman, J. J.; Kothari, S.;
- 545 Lyons, M. P.; Sheth, S. N.; Tiffin, P.; Moeller, D. A. *American Naturalist* **2020**, *195*, 412–
- 546 431.
- 547 [16] Rivett, D. W.; Scheuerl, T.; Culbert, C. T.; Mombrikotb, S. B.; Johnstone, E.; Barraclough, T. G.;
- 548 Bell, T. *The ISME journal* **2016**,
- 549 [17] Liow, L. H.; Van Valen, L.; Stenseth, N. C. Red Queen: From populations to taxa and com-
- 550 munities. 2011.
- 551 [18] Jousset, A.; Eisenhauer, N.; Merker, M.; Mouquet, N.; Scheu, S. *Science Advances* **2016**, *2*.
- 552 [19] Ridenhour, B. J. *The American Naturalist* **2005**, *166*, 12–25.
- 553 [20] Summers, Z. M.; Fogarty, H. E.; Leang, C.; Franks, A. E.; Malvankar, N. S.; Lovley, D. R. *Science*
- 554 **2010**, *330*, 1413–1415.
- 555 [21] Hillesland, K. L.; Lim, S.; Flowers, J. J.; Turkarslan, S.; Pinel, N.; Zane, G. M.; Elliott, N.; Qin, Y.;
- 556 Wu, L.; Baliga, N. S.; Zhou, J.; Wall, J. D.; Stahl, D. A. *PNAS* **2014**, 1407986111–.
- 557 [22] Zhang, X.; Reed, J. L. *PLOS ONE* **2014**, *9*, e108297.
- 558 [23] Marchal, M.; Goldschmidt, F.; Derksen-Müller, S. N.; Panke, S.; Ackermann, M.; Johnson, D. R.
- 559 *BMC Evolutionary Biology* **2017**, *17*, 106.
- 560 [24] Fritts, R. K.; Bird, J. T.; Behringer, M. G.; Lipzen, A.; Martin, J.; Lynch, M.; McKinlay, J. B. *The*
- 561 *ISME Journal* **2020**, *14*, 2816–2828.
- 562 [25] Preussger, D.; Giri, S.; Muhsal, L. K.; Oña, L.; Kost, C. *Current Biology* **2020**, *30*, 3580–
- 563 3590.e7.
- 564 [26] Turkarslan, S. et al. *The ISME Journal* **2021**, *15*, 2233–2247.
- 565 [27] Foster, K. R.; Bell, T. *Current biology* **2012**, *22*, 1845–50.
- 566 [28] Sachs, J. L.; Hollowell, A. C. *mBio* **2012**, *3*.

- 567 [29] Chacón, J. M.; Hammarlund, S. P.; Martinson, J. N.; Smith, L. B.; Harcombe, W. R.  
568 <https://doi.org/10.1146/annurev-ecolsys-012121-091753> **2021**, 52, 363–384.
- 569 [30] Morris, J. J.; Lenski, R. E.; Zinser, E. R. *mBio* **2012**, 3.
- 570 [31] Jeffrey Morris, J.; Papoulis, S. E.; Lenski, R. E. *Evolution* **2014**, 68, 2960–2971.
- 571 [32] Cordero, O. X.; Ventouras, L.-A.; DeLong, E. F.; Polz, M. F. *Proceedings of the National*  
572 *Academy of Sciences* **2012**, 109, 20059–20064.
- 573 [33] Sachs, J.; Simms, E. *Trends in Ecology & Evolution* **2006**, 21, 585–592.
- 574 [34] Piccardi, P.; Vessman, B.; Mitri, S. *Proceedings of the National Academy of Sciences* **2019**,  
575 116, 15979–15984.
- 576 [35] Bertness, M. D.; Callaway, R. *Trends in Ecology & Evolution* **1994**, 9, 191–193.
- 577 [36] van der Gast, C. J.; Thompson, I. P. *Biotechnology and Bioengineering* **2005**, 89, 357–66.
- 578 [37] van der Gast, C. J.; Thompson, I. P. US 8,703,475 B2. 2014.
- 579 [38] Hillesland, K. L.; Stahl, D. A. *Proceedings of the National Academy of Sciences* **2010**, 107,  
580 2124–2129.
- 581 [39] Foster, K. R.; Bell, T. *Current Biology* **2012**, 22, 1845–1850.
- 582 [40] Barraclough, T. G. *PLOS ONE* **2019**, 14, e0218692.
- 583 [41] Schluter, D.; Price, T. D.; Grant, P. R. *Science* **1985**, 227, 1056–1059.
- 584 [42] Grant, P. R.; Grant, B. R. *Science* **2006**, 313, 224–226.
- 585 [43] Pastore, A. I.; Barabás, G.; Bimler, M. D.; Mayfield, M. M.; Miller, T. E. *Nature Ecology Evo-*  
586 *lution* 2021 5:3 **2021**, 5, 330–337.
- 587 [44] Piccardi, P.; Alberti, G.; Alexander, J. M.; Mitri, S. *The ISME Journal* 2022 16:12 **2022**, 16,  
588 2644–2652.
- 589 [45] Harcombe, W. R.; Chacón, J. M.; Adamowicz, E. M.; Chubiz, L. M.; Marx, C. J. *Proceedings*  
590 *of the National Academy of Sciences of the United States of America* **2018**, 115, 12000–  
591 12004.

- 592 [46] Harcombe, W. *Evolution* **2010**, 64, 2166–72.
- 593 [47] Mas, A.; Jamshidi, S.; Lagadeuc, Y.; Eveillard, D.; Vandenkoornhuys, P. Beyond the Black  
594 Queen Hypothesis. 2016; [www.nature.com/ismej](http://www.nature.com/ismej).
- 595 [48] O'Brien, S.; Hodgson, D. J.; Buckling, A. *Proceedings of the Royal Society B: Biological*  
596 *Sciences* **2014**, 281, 20140858.
- 597 [49] O'Brien, S.; Buckling, A. *EMBO reports* **2015**, 16, 1241–1245.
- 598 [50] Blair, J. M.; Webber, M. A.; Baylay, A. J.; Ogbolu, D. O.; Piddock, L. J. Molecular mechanisms  
599 of antibiotic resistance. 2015; [www.nature.com/reviews/micro](http://www.nature.com/reviews/micro).
- 600 [51] Bottery, M. J.; Wood, A. J.; Brockhurst, M. A. *Antimicrobial Agents and Chemotherapy* **2016**,  
601 **60**, 2524–2527.
- 602 [52] Bottery, M. J.; Pitchford, J. W.; Friman, V.-P. *The ISME Journal*
- 603 [53] Celiker, H.; Gore, J. *Nature Communications* **2014**, 5, 1–8.
- 604 [54] Hekstra, D. R.; Leibler, S. *Cell* **2012**, 149, 1164–1173.
- 605 [55] De Wit, G.; Svet, L.; Lories, B.; Steenackers, H. P. *Annual Review of Microbiology* **2022**, 76,  
606 179–192.
- 607 [56] Koren, S.; Walenz, B. P.; Berlin, K.; Miller, J. R.; Bergman, N. H.; Phillippy, A. M. *Genome*  
608 *Research* **2017**, 27, 722–736, Company: Cold Spring Harbor Laboratory Press Distributor:  
609 Cold Spring Harbor Laboratory Press Institution: Cold Spring Harbor Laboratory Press  
610 Label: Cold Spring Harbor Laboratory Press Publisher: Cold Spring Harbor Lab.
- 611 [57] Vaser, R.; Sović, I.; Nagarajan, N.; Šikić, M. *Genome Research* **2017**, 27, 737–746.
- 612 [58] Wick, R. R.; Holt, K. E. *PLOS Computational Biology* **2022**, 18, e1009802, Publisher: Public  
613 Library of Science.
- 614 [59] Schwengers, O.; Jelonek, L.; Dieckmann, M. A.; Beyvers, S.; Blom, J.; Goesmann, A. *Microbial*  
615 *Genomics* **2021**, 7, 000685, Publisher: Microbiology Society,.
- 616 [60] FastQC. 2015; <https://qubeshub.org/resources/fastqc>.
- 617 [61] Bolger, A. M.; Lohse, M.; Usadel, B. *Bioinformatics* **2014**, 30, 2114–2120.

- 618 [62] Li, H. *Bioinformatics* **2018**, *34*, 3094–3100.
- 619 [63] Danecek, P.; Bonfield, J. K.; Liddle, J.; Marshall, J.; Ohan, V.; Pollard, M. O.; Whitwham, A.;  
620 Keane, T.; McCarthy, S. A.; Davies, R. M.; Li, H. *GigaScience* **2021**, *10*, giab008.
- 621 [64] Garrison, E.; Marth, G. Haplotype-based variant detection from short-read sequencing.  
622 2012; <http://arxiv.org/abs/1207.3907>, arXiv:1207.3907 [q-bio].
- 623 [65] Wood, D. E.; Salzberg, S. L. *Genome Biology* **2014**, *15*, R46.
- 624 [66] Zhang, X.; Jonassen, I. *BMC Bioinformatics* **2020**, *21*, 110.

625 **Supplementary tables and figures**

| Species                | Combination                             | Number of generations (mean $\pm$ std) |
|------------------------|-----------------------------------------|----------------------------------------|
| <i>A. tumefaciens</i>  | CAt (At alone)                          | 307 $\pm$ 8                            |
| <i>C. testosteroni</i> | CCt (Ct alone)                          | 295 $\pm$ 4                            |
| <i>A. tumefaciens</i>  | CAtCtMl (3 species evolving together)   | 286 $\pm$ 1                            |
| <i>C. testosteroni</i> | CAtCtMl (3 species evolving together)   | 290 $\pm$ 3                            |
| <i>M. liquefaciens</i> | CAtCtMl (3 species evolving together)   | 285 $\pm$ 1                            |
| <i>A. tumefaciens</i>  | CAtCtMlOa (4 species evolving together) | 283 $\pm$ 2                            |
| <i>C. testosteroni</i> | CAtCtMlOa (4 species evolving together) | 290 $\pm$ 2                            |
| <i>M. liquefaciens</i> | CAtCtMlOa (4 species evolving together) | 277 $\pm$ 17                           |
| <i>O. anthropi</i>     | CAtCtMlOa (4 species evolving together) | 290 $\pm$ 2                            |

Table S1: Number of generations per species averaged over microcosms in which that species survived until transfer 44. The number of generations  $n$  was computed for each microcosm and each transfer as  $n = \log_{10}(b/B)/\log_{10}(2)$ , where  $b$  is the CFU/ml at the beginning of a transfer (CFU/ml of the previous transfer divided by 100) and  $B$  the CFU/ml at the end of that same transfer. We then summed  $n$  over all transfers and took the average over all microcosms of that species in a given combination.

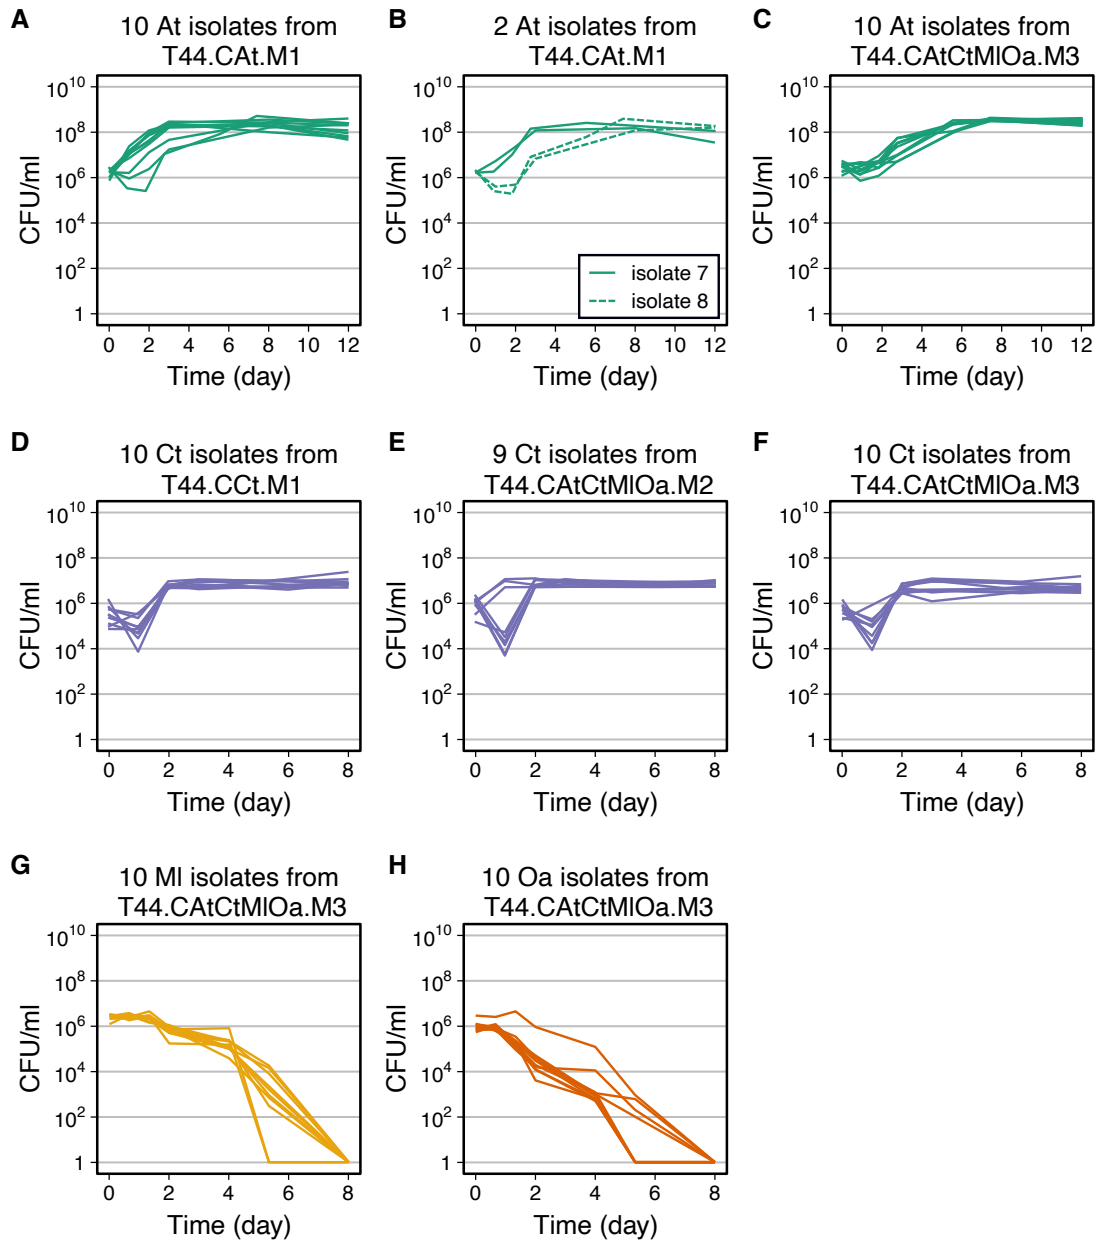

Figure S1: Growth curves of *A. tumefaciens* and *C. testosteroni* isolates from transfer 44. (A) Ten isolates of *A. tumefaciens* evolved alone from microcosm 1. (B) Two biological replicates of two of the isolates of *A. tumefaciens* shown in panel A to verify their growth differences. (C) Ten isolates of *A. tumefaciens* when evolved together with others (CAtCtMIOa, microcosm 3). (D) Ten isolates of *C. testosteroni* evolved alone from microcosm 1. (E) Nine isolates of *C. testosteroni* when evolved together with others (CAtCtMIOa, microcosm 2). This suggests some intra-species variability, which we investigate further in Fig. S2. (F) Ten isolates of *C. testosteroni* when evolved together with others (CAtCtMIOa, microcosm 3). (G) Ten isolates of *M. liquefaciens* when evolved together with others (CAtCtMIOa, microcosm 3). (H) Ten isolates of *O. anthropi* when evolved together with others (CAtCtMIOa, microcosm 3).

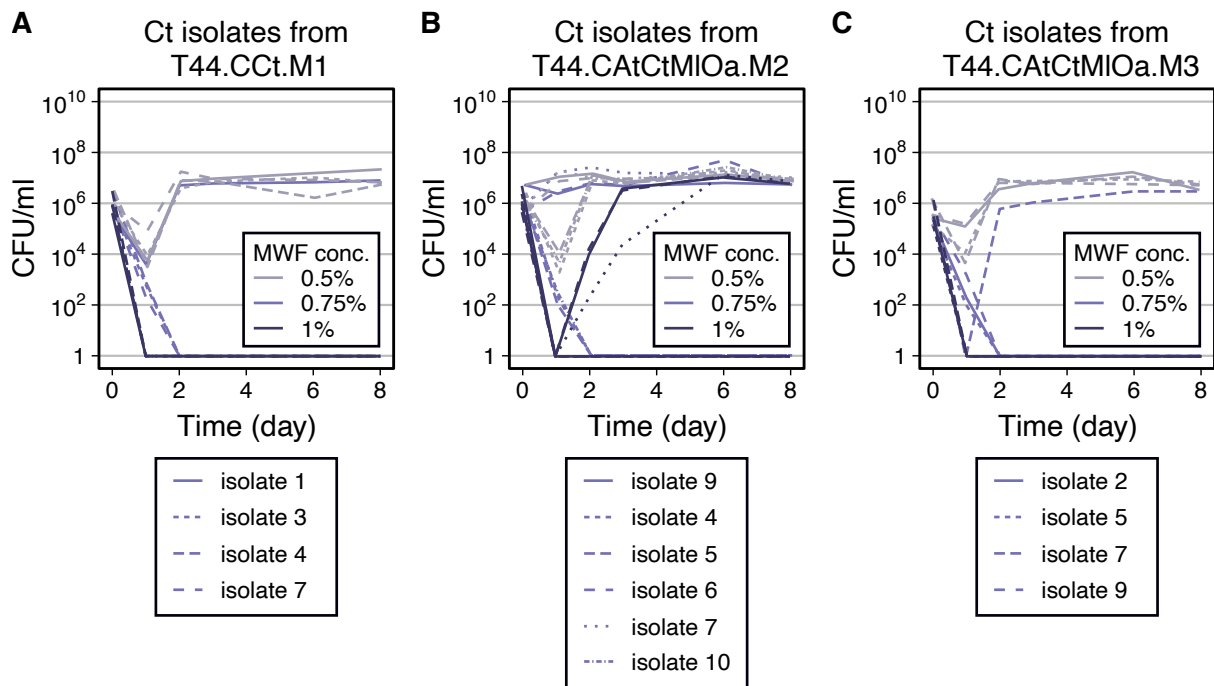

Figure S2: Growth curves of *C. testosteroni* isolates from transfer 44 in increasing concentrations of MWF over 8 days. All other experiments in this study were done at MWF concentration 0.5%. (A) Four isolates of *C. testosteroni* evolved alone, from microcosm 1. (B) Six isolates of *C. testosteroni* when evolved together with others (CAtCtMIOa) from microcosm 2. Here we see that some isolates are able to grow at higher MWF concentrations than we used in our experiment (0.5%) (C) Four isolates of *C. testosteroni* when evolved together with others (CAtCtMIOa) from microcosm 3.



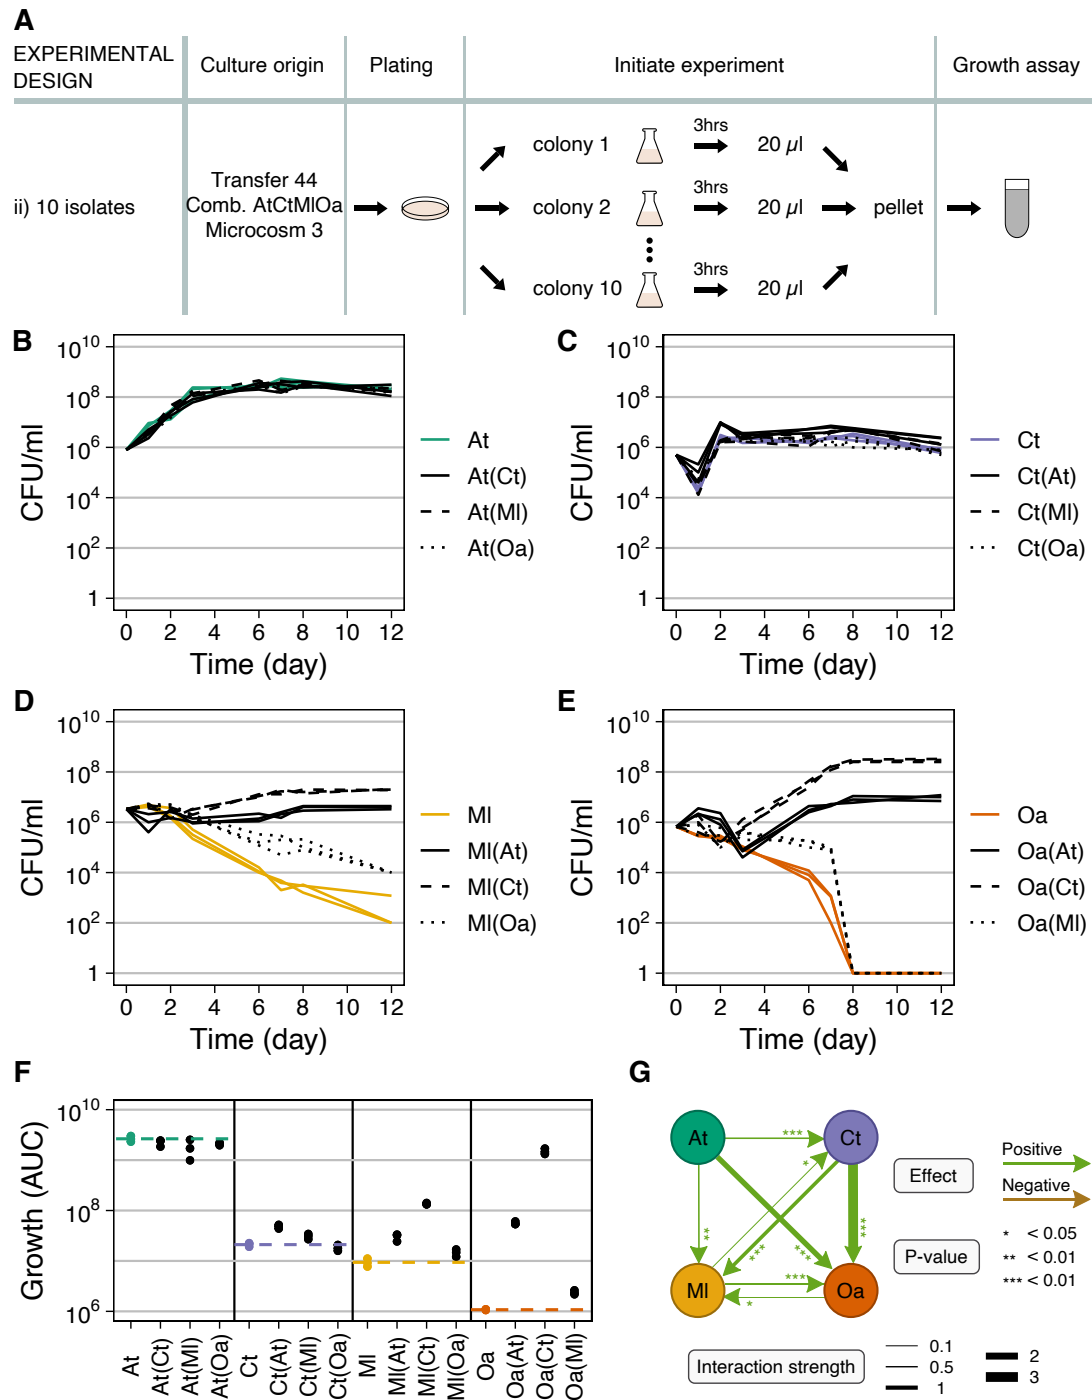

Figure S3: Comparison of co-evolved microcosm 3 mono- and pairwise co-cultures. (A) Ten evolved isolates of the same species were randomly picked and grown alone 3 hours to exponential phase, then washed, resuspended and mixed in equal proportions in MWF. (B=E) Population size quantified in colony-forming units per milliliter over time for mono-cultures (in color) and pairwise co-cultures (in black; co-culture partner indicated in brackets). In the co-cultures, each species could be quantified separately by selective plating. Each panel shows the data for 1 species: (B) *A. tumefaciens* (At), (C) *C. testosteroni* (Ct), (D) *M. liquefaciens* (MI) and (E) *O. anthropi* (Oa). (F) AUC in B=E. Dashed lines indicate the mean of the mono-cultures, shown in color. Statistical significance and interaction strengths data are shown in Dataset S1.

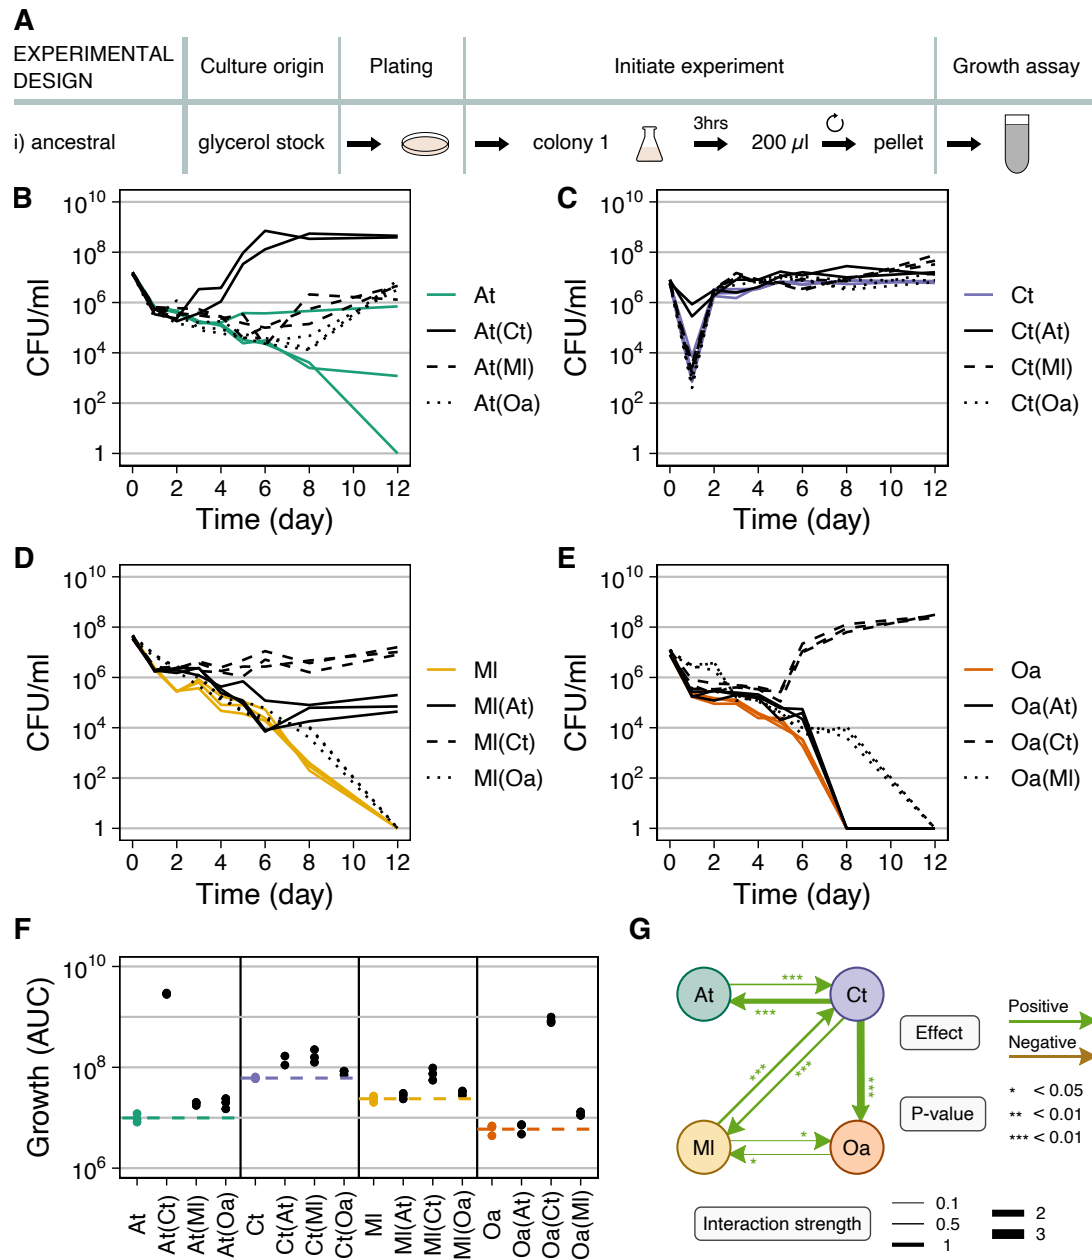

Figure S4: Comparison of ancestral mono- and pairwise co-cultures, adapted from <sup>34</sup>. (A) Glycerol stock of ancestral isolate was grown alone 3 hours to exponential phase, then washed and resuspended in MWF. (B=E) Population size quantified in colony-forming units per milliliter over time for mono-cultures (in color) and pairwise co-cultures (in black; co-culture partner indicated in brackets). In the cocultures, each species could be quantified separately by selective plating. Each panel shows the data for 1 species: (B) *A. tumefaciens* (At), (C) *C. testosteroni* (Ct), (D) *M. liquefaciens* (MI) and (E) *O. anthropi* (Oa). (F) AUC in B=E. Dashed lines indicate the mean of the mono-cultures, shown in color.

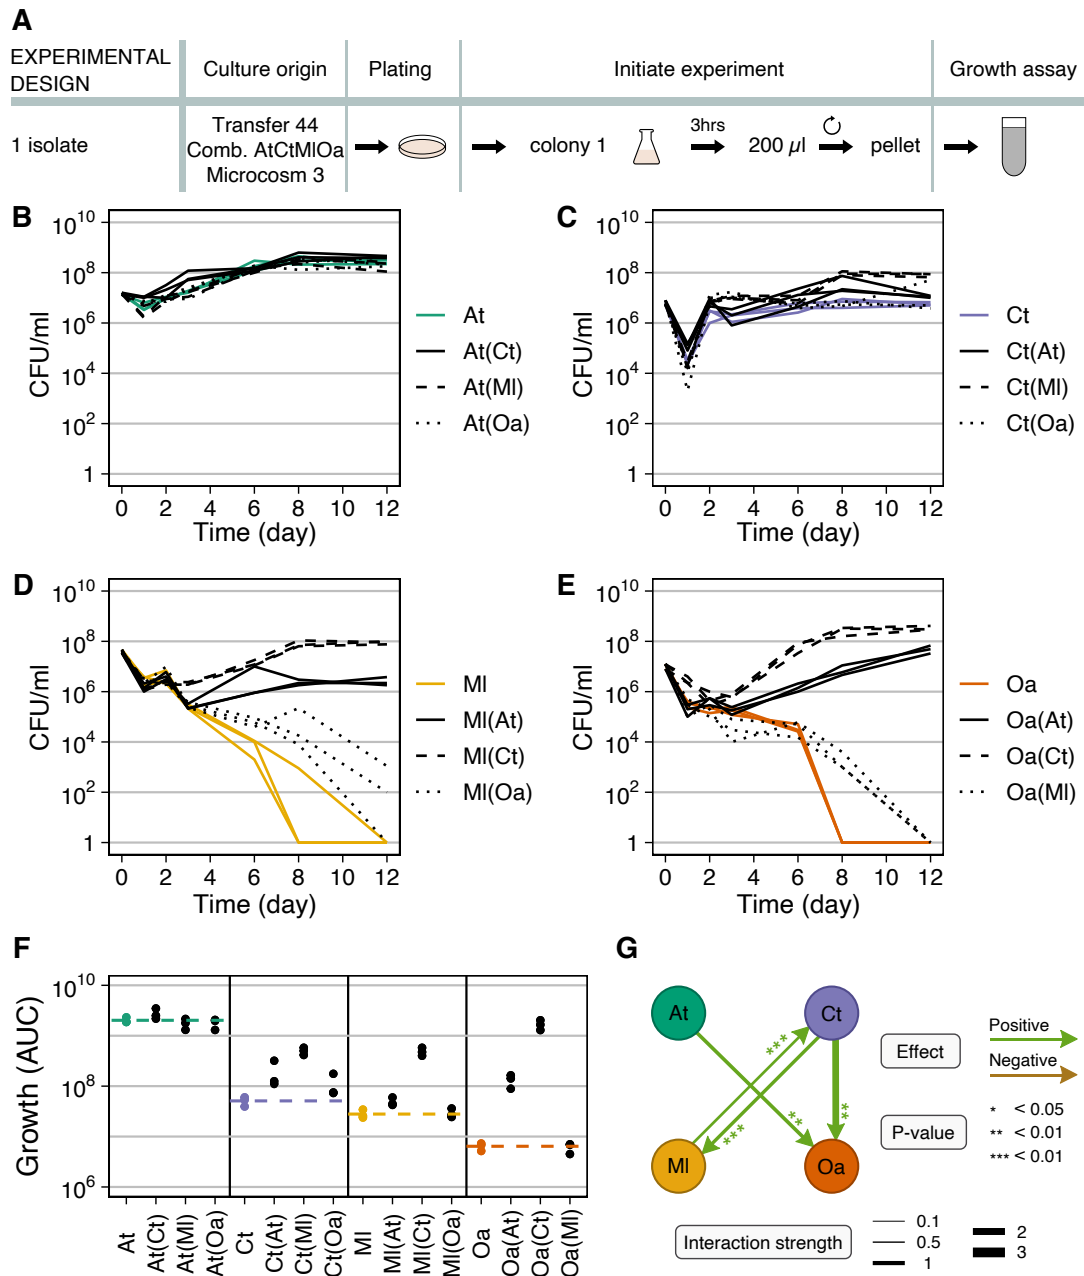

Figure S5: Comparison of co-evolved microcosm 3 mono- and pairwise co-cultures. (A) One evolved isolate of each species was randomly picked and grown alone 3 hours to exponential phase, then washed, resuspended and mixed in equal proportions in MWF. (B=E) Population size quantified in colony-forming units per milliliter over time for mono-cultures (in color) and pairwise co-cultures (in black; co-culture partner indicated in brackets). In the co-cultures, each species could be quantified separately by selective plating. Each panel shows the data for 1 species: (B) *A. tumefaciens* (At), (C) *C. testosteroni* (Ct), (D) *M. liquefaciens* (MI) and (E) *O. anthropi* (Oa). (F) AUC in B=E. Dashed lines indicate the mean of the mono-cultures, shown in color. Statistical significance and interaction strengths data are shown in Dataset S2.

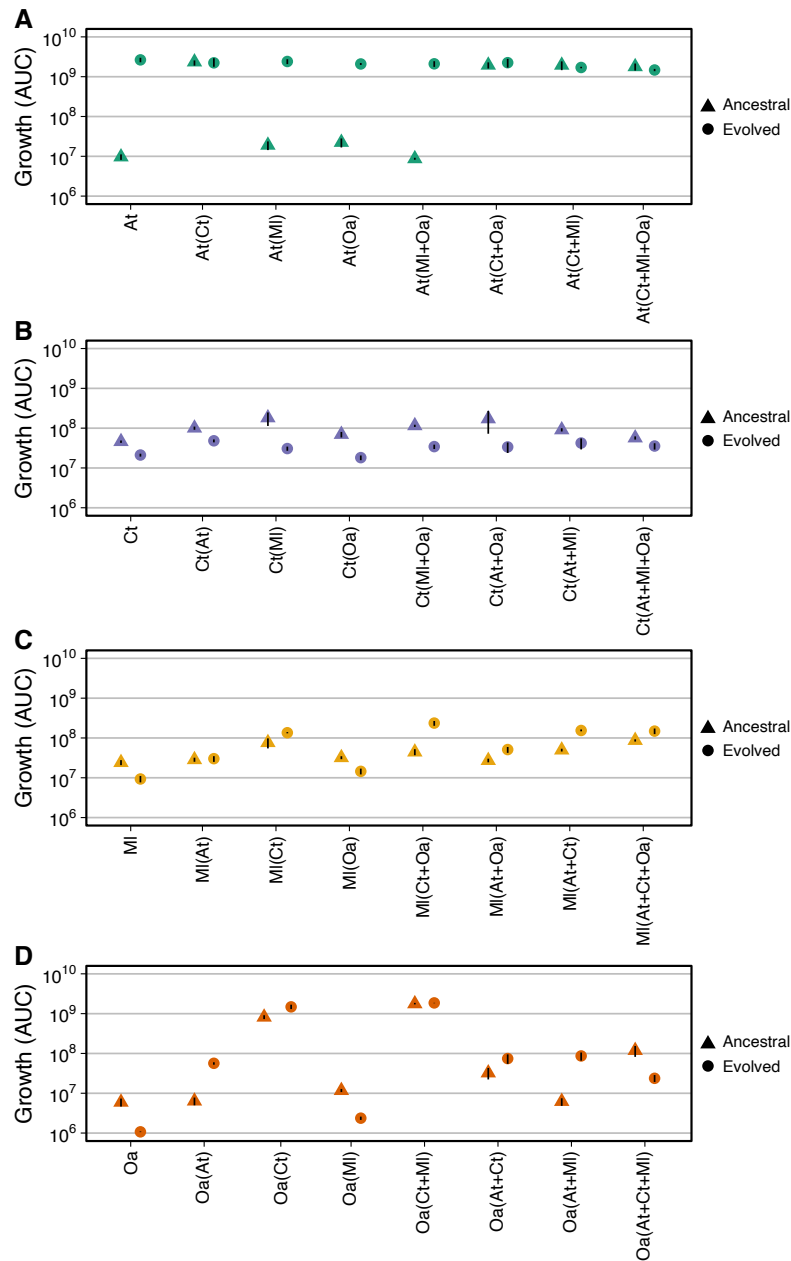

Figure S6: AUC comparison of ancestral species and those evolved in CAAtCtMIOa, microcosm 3, including mono- and co-cultures treatments for (A) *A. tumefaciens*, (B) *C. testosteroni*, (C) *M. liquefaciens*, and (D) *O. anthropi*. Evolved strains were co-cultured with isolates from the same microcosm and ancestral strains were co-cultured with other ancestors.

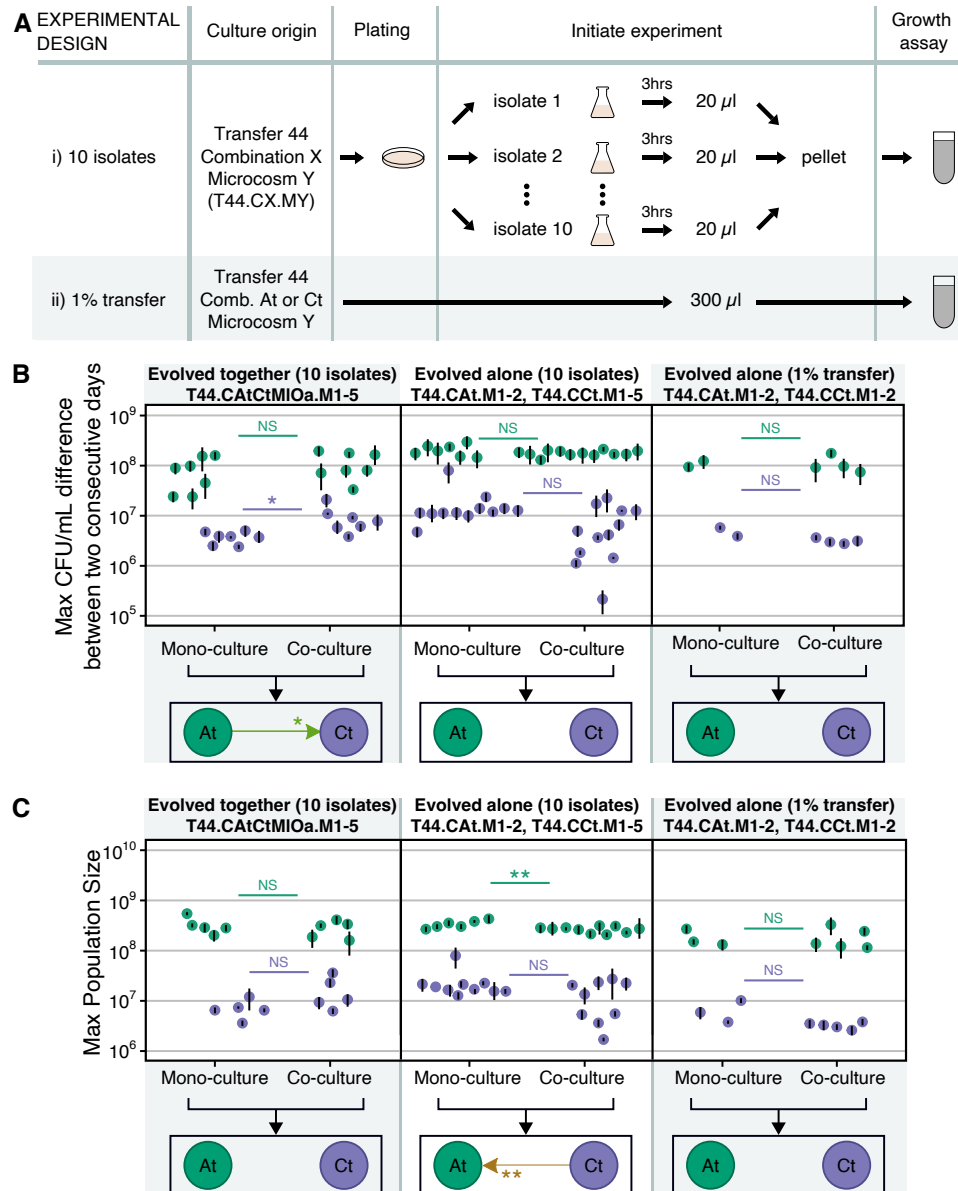

Figure S7: Interactions based on maximum growth rate and maximum population size. A) Protocols for growth assays, matching those in Fig. 3A. (B-C) Interactions between *A. tumefaciens* and *C. testosteroni* based on maximum growth rate quantified as the maximal CFU/ml difference between two consecutive days (B) or maximum population size (C), either evolved together (first column, CAtCtMIOa) or evolved alone (2nd and 3rd column, CAt and CCt, protocols i and ii from panel A) during 8-day growth assays. Other details are as in Fig. 3C.

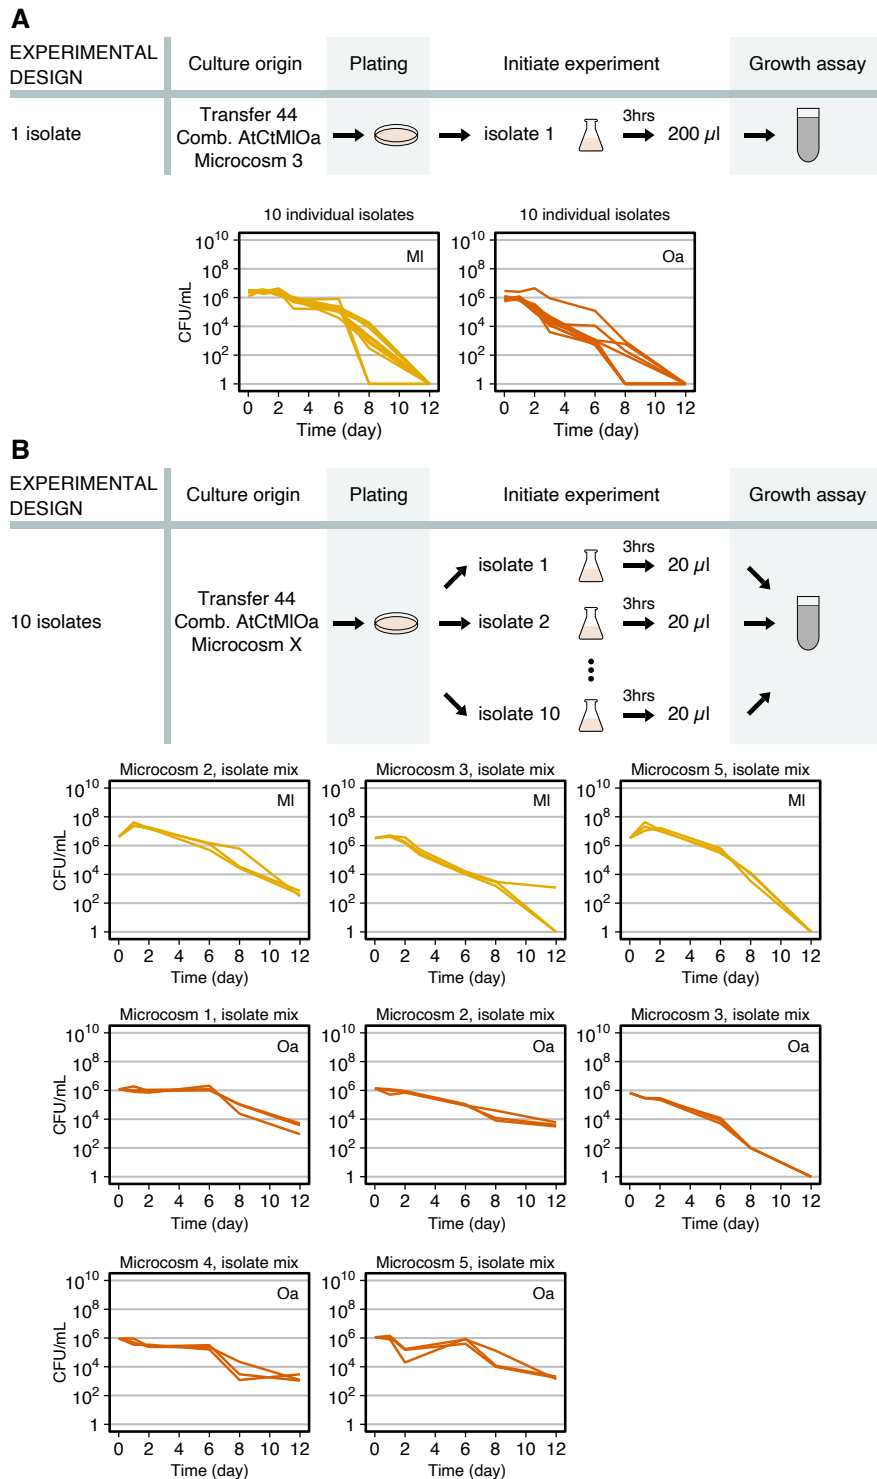

Figure S8: Mono-culture growth curves of evolved *M. liquefaciens* or *O. anthropi* from transfer 44, CAAtCtMI/Oa during 12-day growth assays. Conditions and microcosms are indicated above each graph. (A) One isolates was randomly picked and grown alone 3 hours to exponential phase, then washed and resuspended in MWF. Each growth curve represents one of 10 such isolates. (B) Ten evolved isolates were randomly picked and grown alone 3 hours to exponential phase, then washed, resuspended as a mixed culture in MWF. Each panel shows triplicates of isolates the same condition and microcosm.

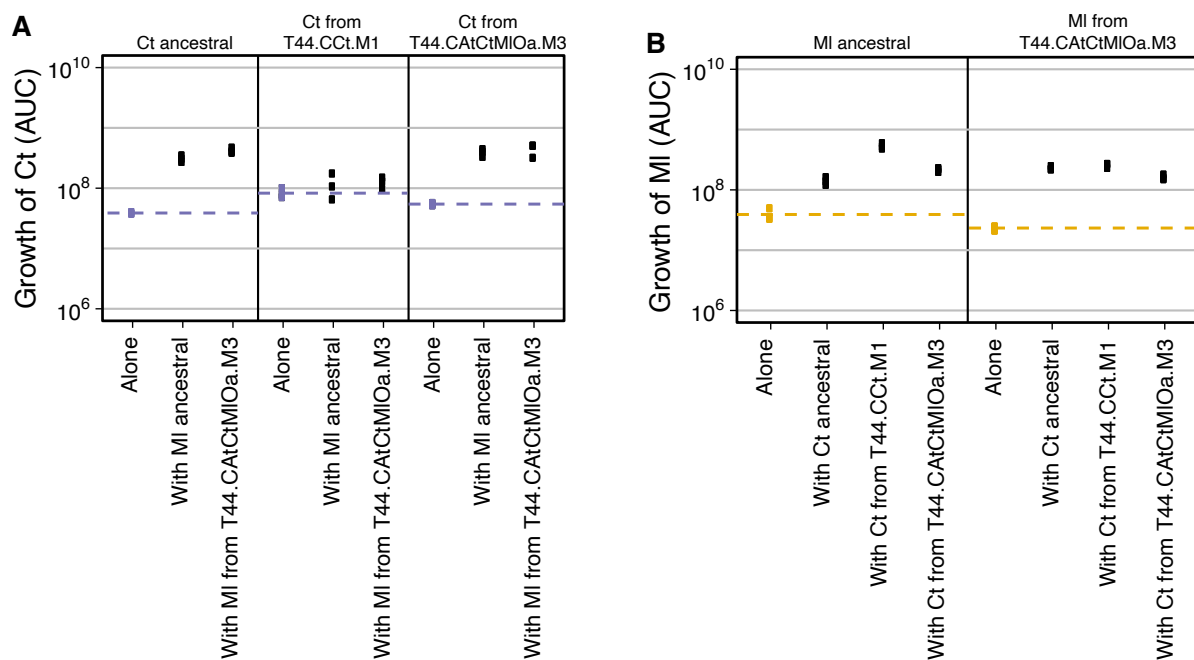

Figure S9: Interactions between *Ct* and *MI*. (A) Growth of different *Ct* isolates (ancestral, evolved alone or evolved with the three others) alone or in co-culture with different *MI* isolates (ancestral or evolved with the three others). (B) Growth of different *MI* isolates alone or in co-culture with different *Ct* isolates. Community-evolved *Ct* and *MI* were isolated from the same microcosm. Ancestral and community-evolved *Ct* and *MI* all had positive effects on one another, but the positive effects did not increase between the isolates of the two species coming from the same microcosm, suggesting that at least in this microcosm, *Ct* and *MI* did not evolve stronger mutualism.

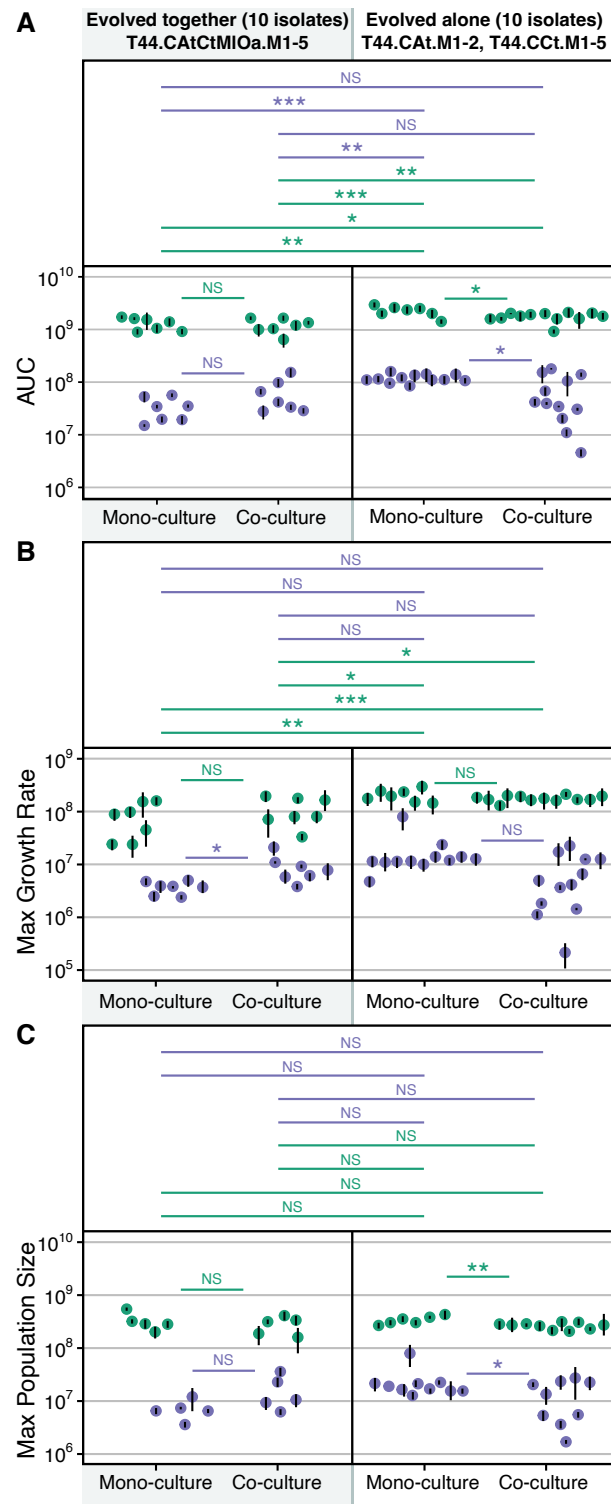

Figure S10: Inter-group comparison from Fig. 3C. The data show interactions between *A. tumefaciens* and *C. testosteroni* co-evolved (first column) or mono-evolved (second column) during 8-day growth assays. The first row measures the AUC of their growth curves during 8-day growth assays. The second and third row measure their maximum growth rates and maximum population size reached during these growth assays.



**A**

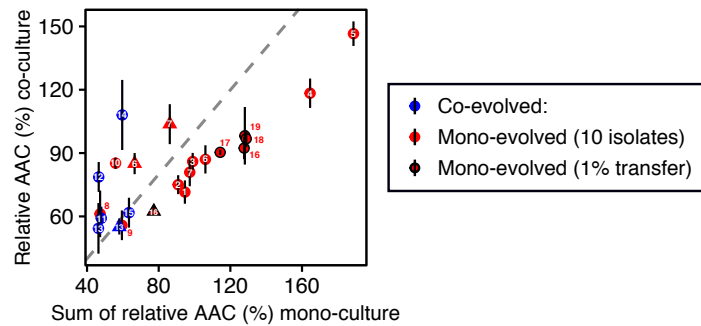

1a) We performed linear regression and calculated the estimated value of the coefficient as well as its standard error (these data are needed to calculate t-test):

- ◆ Linear regression, coefficient = 0.091, std error= 0.176, p-value < 0.05 \*
- ◆ Linear regression, coefficient = 1.471, std error= 0.266, p-value < 0.001 \*\*\*
- ◆ Linear regression, coefficient = 0.091, std error= 0.157, p-value < 0.001 \*\*\*

1b) Next, we calculated p-value against the null hypothesis  $H_0(\text{slope}) = 1$ :

- ◆ T-test,  $t = -5.170$ , p-value < 0.05 \*, following Bonferroni correction
- ◆ T-test,  $t = 1.771$ , p-value = 0.214, following Bonferroni correction
- ◆ T-test,  $t = 3.258$ , p-value = 0.094, following Bonferroni correction

2) We performed linear model to compare between groups:

- ◆ vs. ◆ Linear model with biological replicates as random factor,  $t = 2.418$ , p-value = 0.056, following Bonferroni correction
- ◆ vs. ◆ Linear model with biological replicates as random factor,  $t = 6.450$ , p-value = 0.000236 \*\*\*, following Bonferroni correction
- ◆ vs. ◆ Linear model with biological replicates as random factor,  $t = 0.933$ , p-value = 0.732, following Bonferroni correction

**B**

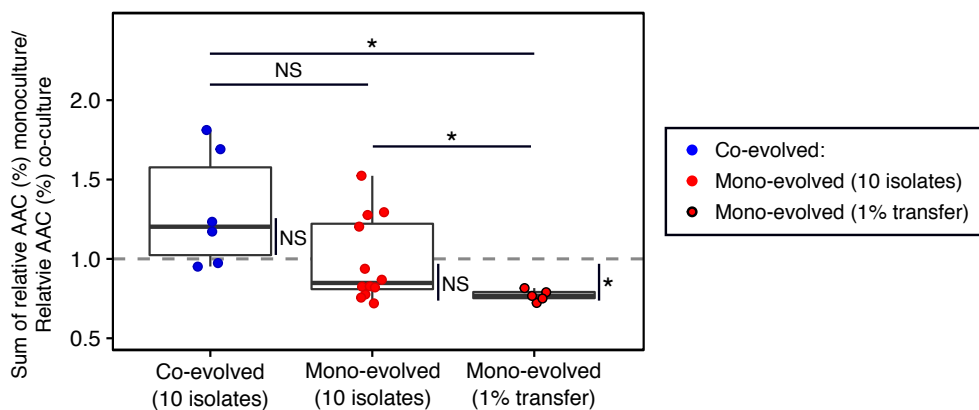

1) We calculated p-value against the null hypothesis  $H_0(\text{median}) = 1$ :

- Sign-test, is the median greater than  $H_0(\text{median}) = 1$  ?, p-value = 0.3437
- Sign-test, is the median lower than  $H_0(\text{median}) = 1$  ?, p-value = 0.1938
- Sign-test, is the median lower than  $H_0(\text{median}) = 1$  ?, p-value = 0.0392 \*

2) We performed t-test to compare between groups:

- vs. ● T-test,  $t = -1.9306$ , p-value = 0.181, following Bonferroni correction
- vs. ● T-test,  $t = 3.5878$ , p-value = 0.03028 \*, following Bonferroni correction
- vs. ● T-test,  $t = 2.6955$ , p-value < 0.0392 \*, following Bonferroni correction

Figure S11: Results of statistical analysis of the additive null model to degradation efficiency in Fig. 5C). (A) Linear model. (B) T-test. Co-evolved is from species combination CAAtCtMIOa and mono-evolved from CAAt or CCT.

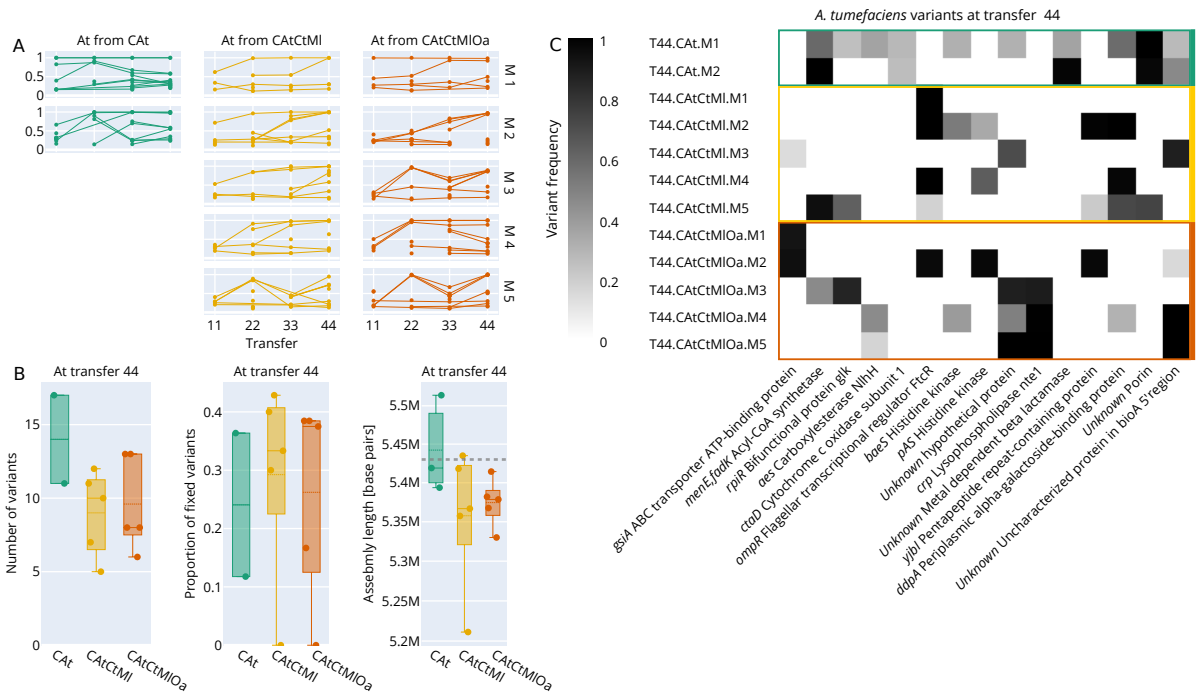

Figure S12: (A) Variant frequency trajectories in all *A. tumefaciens* populations. (B) Number of variants found in each *A. tumefaciens* population (left). De-novo long-read assembly lengths of selected isolates. Dashed line represents assembly length of the ancestor (middle). Proportion of variants that reached fixation (right). (C) Mutated genes with protein annotation that were found in at least two *A. tumefaciens* populations. The color indicates the frequency of the mutated allele.

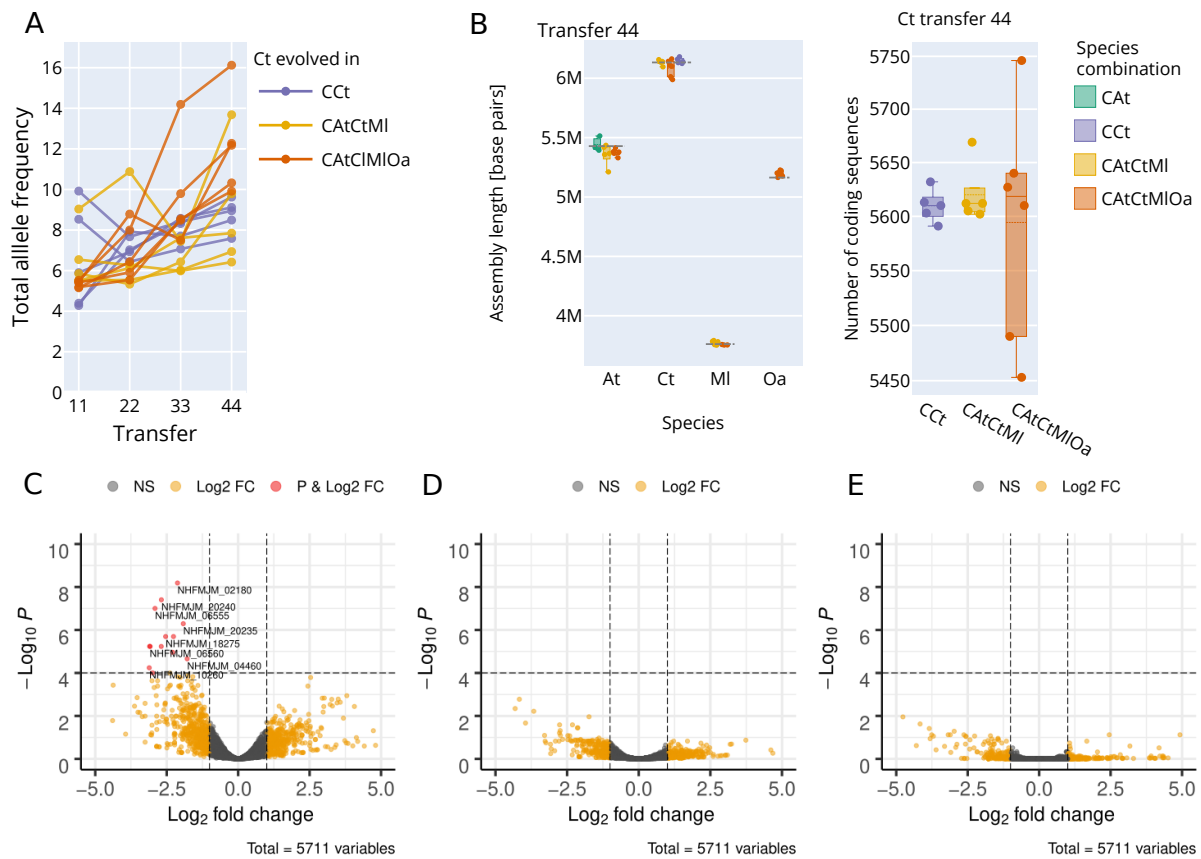

Figure S13: (A) Total allele frequency for *C. testosteroni*. (B) Long-read assembly lengths of isolates from transfer 44 with the dashed line representing the assembly length of the ancestor (left). Number of coding sequences per assembly (right). (C) Gene expression for *C. testosteroni* evolved under condition 2 compared to ancestor. (D) Gene expression for *C. testosteroni* evolved under condition 3 compared to ancestor. (E) Gene expression for *C. testosteroni* evolved under CATctMIOa compared to ancestor.

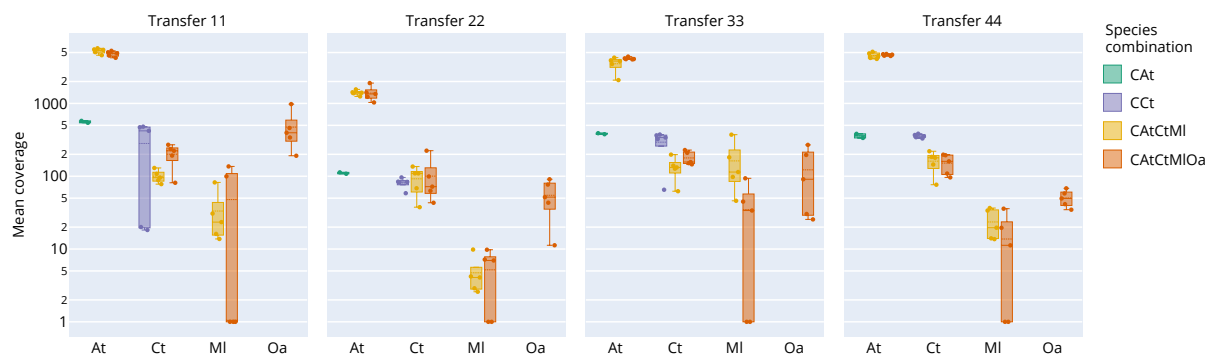

Figure S14: Mean Illumina coverage.

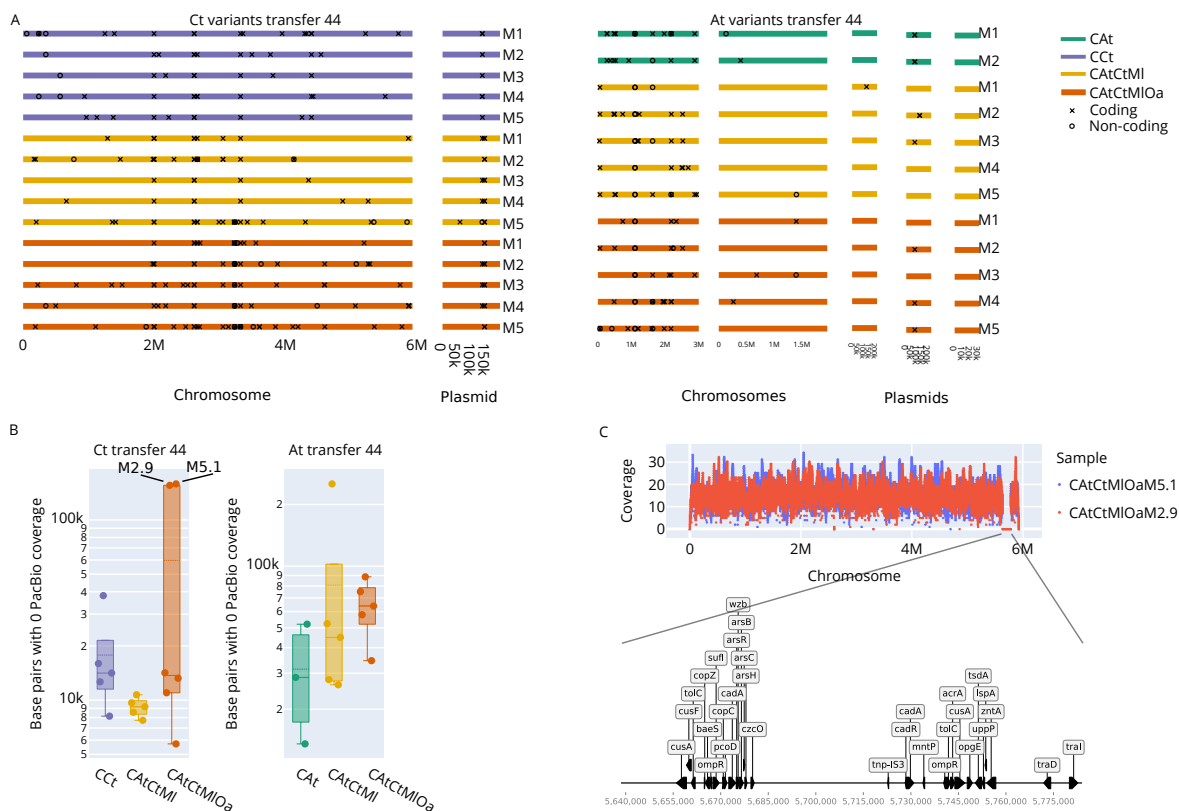

Figure S15: (A) Positions of variants across all frequencies identified from the Illumina data from the last transfer. (B) Base pairs with zero-coverage when aligning corrected PacBio reads to the reference genome. (C) PacBio coverage for two Ct isolates of CAtCtMIOa showing large deletion (top). Annotation of deleted sequence (bottom).

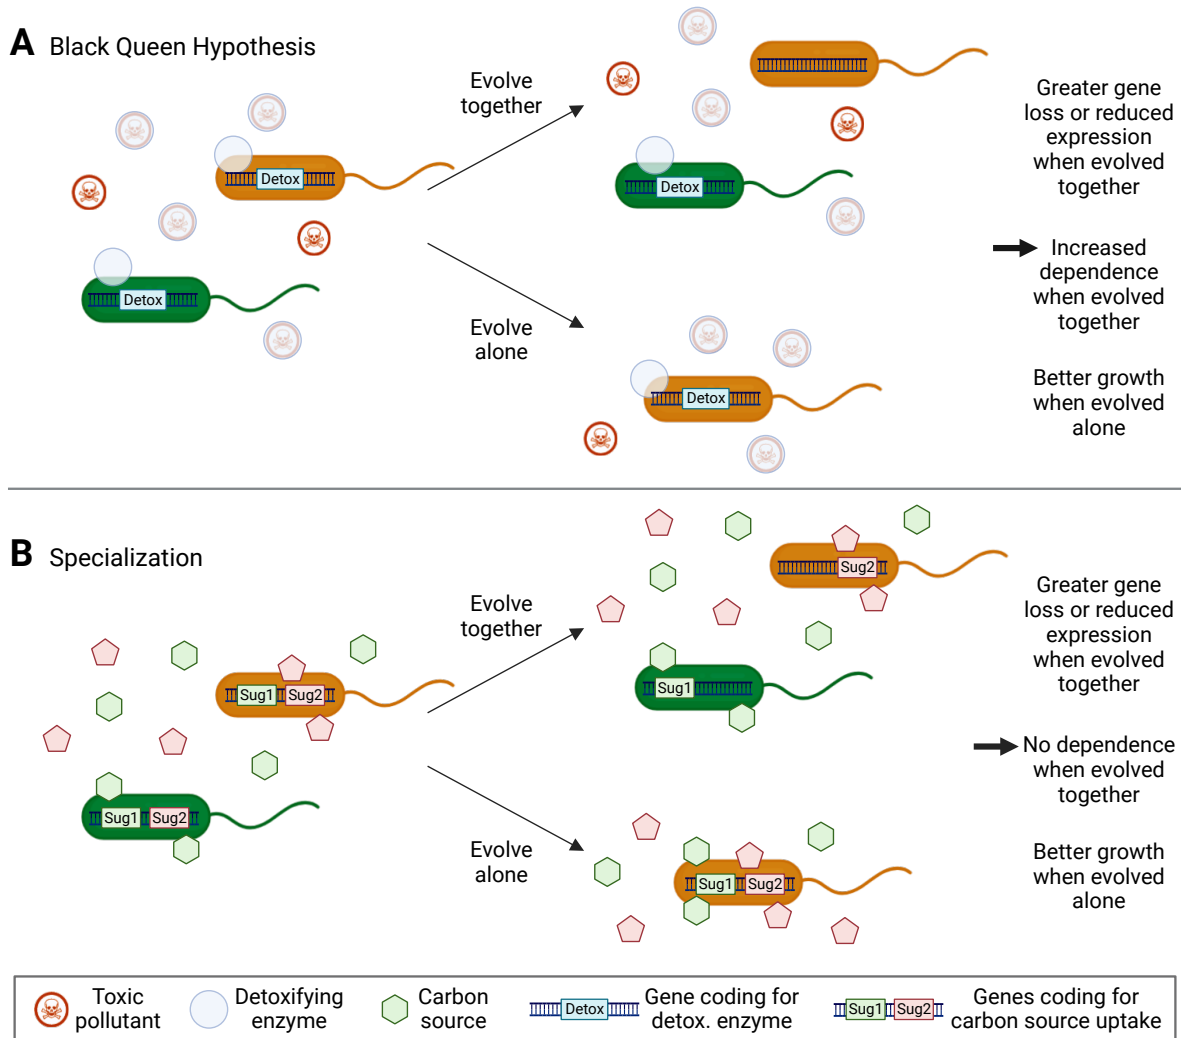

Figure S16: BQH and specialization make similar predictions. (A) The BQH predicts that species evolved together in community should lose traits coding for public goods, like detoxification genes either by deletions or mutations leading to reduced gene expression. Such losses should not be observed when evolving alone. Species evolved together should therefore grow significantly worse alone and depend on the partner species for survival. (B) The evolution of specialization predicts similar trait loss when evolving together and should similarly grow best when evolved alone, but species evolved in community should not depend on their partners to grow alone (black arrows on the right). Initially both species can take up both carbon sources but with a preference for one or the other. After evolution alone, the orange species can take up both efficiently. Generated using Biorender.

| Gene ID      | Gene        | Product                                         | Log2 fold change | -Log10P  |
|--------------|-------------|-------------------------------------------------|------------------|----------|
| NHFMJM_02180 | Unknown     | hypothetical protein                            | -2.122160        | 8.186240 |
| NHFMJM_04460 | Unknown     | hypothetical protein                            | -1.783635        | 4.657574 |
| NHFMJM_06555 | Unknown     | Putative lipoprotein                            | -2.909484        | 7.003442 |
| NHFMJM_06560 | <i>rpoE</i> | RNA polymerase, sigma-24 subunit, ECF subfamily | -3.096592        | 5.238158 |
| NHFMJM_10260 | <i>raiA</i> | Ribosomal subunit interface protein             | -3.110503        | 4.240304 |
| NHFMJM_18275 | Unknown     | 3-demethylubiquinone-9 3-methyltransferase      | -2.537547        | 5.694750 |
| NHFMJM_20235 | Unknown     | DUF937 domain-containing protein                | -1.919700        | 6.292688 |
| NHFMJM_20240 | Unknown     | Inosine-5'-monophosphate dehydrogenase          | -2.685720        | 7.404975 |

Table S2: Differentially expressed genes in *C. testosteroni* evolved alone (CCT).
